# Supplementary material
Source: publisher site journal article supplement (https://www.spandidos-publications.com/2128/downloadSupplementary)
Supplement: Supplementary file 1 [file downloadSupplementary]

## Sheet: full
DATA S2. Co-expressed protein with KRT80 in CRC>
Correlated gene	Cytoband	r	P-value	q-Value
MANSC1	12p13.2	1	0	0
GP1BB	22q11.21	-1	0	0
POLA2	11q13.1	1	0	0
DKK4	8p11.21	1	0	0
SNCG	10q23.2	1	0	0
PCLAF	15q22.31	1	0	0
ADA2	22q11.1	1	0	0
RPS13	11p15.1	0.53194	1.35979e-07	9.41654e-05
IPO8	12p11.21	0.544257	1.92987e-06	0.00118794
EIF4E	4q23	0.477843	3.27774e-06	0.00181587
RPL38	17q25.1	0.474617	3.89726e-06	0.0019401
HBD	-	0.473202	4.20238e-06	0.0019401
TPP1	11p15.4	0.465975	6.14345e-06	0.00259369
HBA1	16p13.3	0.463578	6.95465e-06	0.00259369
PSMB3	17q12	0.46339	7.02262e-06	0.00259369
ANP32A	15q23	0.459107	8.74406e-06	0.00302763
BLOC1S4	4p16.1	0.643725	9.82893e-06	0.00320307
TTLL12	22q13.2	0.454125	1.12421e-05	0.00342653
C1QBP	17p13.2	0.453238	1.17516e-05	0.00342653
SPTB	14q23.3	0.449012	1.44915e-05	0.00401416
ALYREF	17q25.3	0.449541	1.58928e-05	0.00409311
PSMB10	16q22.1	0.461721	1.62542e-05	0.00409311
CCDC47	17q23.3	0.445593	1.92443e-05	0.00463537
LMAN2	5q35.3	0.442049	2.03441e-05	0.0046961
RPL3	22q13.1	0.436672	2.63052e-05	0.00561873
PSPC1	13q12.11	0.436313	2.67557e-05	0.00561873
RAB18	10p12.1	0.435822	2.73837e-05	0.00561873
VPS26B	11q25	0.543328	3.15267e-05	0.00567556
GANAB	11q12.3	0.432803	3.15617e-05	0.00567556
TMED2	12q24.31	0.442409	3.16074e-05	0.00567556
NIBAN2	9q34.11	0.431822	3.30429e-05	0.00567556
MGST3	1q24.1	0.433926	3.34173e-05	0.00567556
CCT4	2p15	0.431332	3.38075e-05	0.00567556
HBB	11p15.4	0.428935	3.77854e-05	0.00614364
LSM12	17q21.31	0.487063	3.88136e-05	0.00614364
RPL4	15q22.31	0.427426	4.05107e-05	0.00623415
CALR	19p13.13	0.425841	4.35686e-05	0.00640142
SURF4	9q34.2	0.425671	4.39087e-05	0.00640142
DDOST	1p36.12	0.424879	4.55287e-05	0.00646741
MMGT1	Xq26.3	0.440652	4.81972e-05	0.00667531
HNRNPF	10q11.21	0.422822	4.99963e-05	0.00675559
RPL9	4p14	0.421576	5.28963e-05	0.00690858
SLC3A2	11q12.3	0.421275	5.36225e-05	0.00690858
ATP5PD	17q25.1	0.420576	5.53376e-05	0.00696751
ANP32B	9q22.33	0.41935	5.84747e-05	0.00715653
COMT	22q11.21	0.418991	5.94225e-05	0.00715653
HACD3	15q22.31	0.419015	6.57318e-05	0.00774797
LONP1	19p13.3	0.414671	7.20265e-05	0.0081502
HBG1	11p15.4	0.414652	7.20866e-05	0.0081502
HLA-B	6p21.33	0.413538	7.5717e-05	0.00834195
PSMA2	7p14.1	0.413218	7.67941e-05	0.00834195
EEF2	19p13.3	0.412708	7.85342e-05	0.00836691
FUBP3	9q34.11-q34.12	0.415491	8.48722e-05	0.00887155
CENPV	17p11.2	0.487084	9.14599e-05	0.00934344
HLA-A	6p22.1	0.408821	9.30649e-05	0.00934344
SERPINH1	11q13.5	0.408482	9.44464e-05	0.00934344
EXOSC5	19q13.2	0.617418	0.000100309	0.00974937
CERS2	1q21.3	0.630865	0.000108451	0.0103589
TOM1	22q12.3	0.404293	0.000113122	0.0103701
GNG5	1p22.3	0.453508	0.000116153	0.0103701
SFPQ	1p34.3	0.403651	0.000116268	0.0103701
HNRNPA1	12q13.13	0.403293	0.00011806	0.0103701
PRRC1	5q23.2	0.402594	0.000121625	0.0103701
PSME2	14q12	0.402387	0.000122704	0.0103701
LRATD2	8q24.21	0.589379	0.000123946	0.0103701
RPL21	13q12.2	0.401557	0.000127108	0.0103701
EIF5A	17p13.1	0.401481	0.000127516	0.0103701
MCU	10q22.1	0.4034	0.000129127	0.0103701
DDX39A	19p13.12	0.401142	0.000129365	0.0103701
PPP1CA	11q13.2	0.40084	0.00013103	0.0103701
RPSA	3p22.1	0.399557	0.000138327	0.0107934
EIF4A2	3q27.3	0.398689	0.000143475	0.0110396
PHB2	12p13.31	0.39799	0.000147743	0.0110958
EIF4A1	17p13.1	0.397915	0.000148212	0.0110958
RPS2	16p13.3	0.397538	0.000150574	0.0111224
SSB	2q31.1	0.397198	0.000152731	0.0111333
SYNJ2BP	14q24.2	0.400688	0.000158803	0.0113106
EZR	6q25.3	0.396198	0.000159246	0.0113106
RPS8	1p34.1	0.395783	0.000162026	0.0113623
EIF4A3	17q25.3	0.395104	0.00016667	0.0115419
BRIX1	5p13.2	0.447815	0.000183683	0.012563
SERBP1	1p31.3	0.392217	0.000187816	0.0125906
STX8	17p13.1	0.495262	0.000189343	0.0125906
IPO7	11p15.4	0.39182	0.000190904	0.0125906
PPP2CB	8p12	0.390854	0.000216959	0.0139257
HNRNPA0	5q31.2	0.388613	0.000217684	0.0139257
HLA-C	6p21.33	0.388499	0.000218689	0.0139257
CANX	5q35.3	0.387103	0.000231448	0.0145707
PRDX4	Xp22.11	0.385084	0.000251113	0.01549
NMNAT1	1p36.22	0.54803	0.000251643	0.01549
HNRNPD	4q21.22	0.383518	0.000267414	0.0162615
HLA-E	6p22.1	0.40637	0.000270047	0.0162615
P4HB	17q25.3	0.382763	0.000275613	0.0164182
CMPK1	1p33	0.382065	0.000283403	0.0164808
MISP	19p13.3	0.38621	0.000285078	0.0164808
TMED4	7p13	0.381744	0.000287049	0.0164808
STOML2	9p13.3	0.381612	0.000288563	0.0164808
RTKN	2p13.1	0.486425	0.000295605	0.0165248
CLTC	17q23.1	0.380801	0.000298025	0.0165248
SCAMP2	15q24.1	0.406287	0.000298282	0.0165248
PNP	14q11.2	0.380216	0.000305023	0.0167309
NDUFA8	9q33.2	0.387795	0.000318619	0.0173054
ANXA2	15q22.2	0.378612	0.000324992	0.0174802
DDX3X	Xp11.4	0.378084	0.000331829	0.0176763
DDX39B	6p21.33	0.37782	0.000335296	0.0176909
RPL6	12q24.13	0.377518	0.0003393	0.0177332
SLC1A5	19q13.32	0.381168	0.000347336	0.0179475
PDCD6	5p15.33	0.376725	0.00035002	0.0179475
ARPC1A	7q22.1	0.380743	0.00035312	0.0179475
NUP62	19q13.33	0.38903	0.000361913	0.0182272
HNRNPK	9q21.32	0.375159	0.000372125	0.0183787
PSME1	14q12	0.37514	0.000372399	0.0183787
GPI	19q13.11	0.374971	0.000374873	0.0183787
HNRNPA3	2q31.2	0.374518	0.000381544	0.0185417
KRT8	12q13.13	0.374121	0.000387471	0.018666
TMED10	14q24.3	0.373631	0.000394926	0.0187548
PPP2R1B	11q23.1	0.373555	0.000396084	0.0187548
RACK1	5q35.3	0.372593	0.000411131	0.0193022
ACTN4	19q13.2	0.372046	0.000419919	0.0195492
BLVRB	19q13.2	0.371121	0.000435159	0.0200226
CYCS	7p15.3	0.37097	0.000437695	0.0200226
CCDC22	Xp11.23	0.403338	0.000443022	0.0200226
LPCAT3	12p13.31	0.4325	0.000447108	0.0200226
B4GALT1	9p21.1	0.403016	0.00044816	0.0200226
VPS37B	12q24.31	0.402116	0.000462837	0.0203929
PPP2R1A	19q13.41	0.369461	0.00046381	0.0203929
U2SURP	3q23	0.368782	0.000476021	0.020591
SNRNP40	1p35.2	0.383958	0.000477251	0.020591
PTGES2	9q34.11	0.368593	0.000479464	0.020591
DNPH1	6p21.1	0.403454	0.000485245	0.0206446
SUPT5H	19q13.2	0.385678	0.000488167	0.0206446
PON2	7q21.3	0.369846	0.000494512	0.0207545
COPE	19p13.11	0.3668	0.000513337	0.0212933
GALK2	15q21.1-q21.2	0.377191	0.000518326	0.0212933
RTRAF	14q22.1	0.366517	0.000518881	0.0212933
OTUB1	11q13.1	0.366064	0.000527866	0.0215028
RNPS1	16p13.3	0.380648	0.000538995	0.0217958
NT5DC1	6q22.1	0.391722	0.000557737	0.0221783
DERL1	8q24.13	0.366562	0.000559697	0.0221783
ACOX1	17q25.1	0.377239	0.000561834	0.0221783
RPS20	8q12.1	0.364196	0.000566453	0.0221783
NUDT21	16q13	0.364102	0.000568468	0.0221783
RPS24	10q22.3	0.363423	0.000583175	0.0225929
H2AFY2	10q22.1	0.364999	0.000593419	0.0228242
VCP	9p13.3	0.362781	0.000597383	0.0228242
HINT1	5q23.3	0.365982	0.000617952	0.0233228
DAZAP1	19p13.3	0.361838	0.000618854	0.0233228
WASHC4	12q23.3	0.369184	0.000642041	0.0240332
PTGES3	12q13.3|12	0.360196	0.000657899	0.0244615
SUN2	22q13.1	0.361657	0.000671809	0.0248122
S100A10	1q21.3	0.358592	0.000698206	0.0256008
PRPF4	9q32	0.362418	0.000704572	0.0256008
PPP2R5D	6p21.1	0.358253	0.000707026	0.0256008
PTBP1	19p13.3	0.357649	0.000722956	0.0260077
GGT1	22q11.23	0.619829	0.000732289	0.0260156
PDIA3	15q15.3	0.35729	0.000732569	0.0260156
AK2	1p35.1	0.356838	0.000744879	0.0262843
PSMA5	1p13.3	0.356441	0.000755804	0.0263708
RPL31	2q11.2	0.356404	0.000756852	0.0263708
CSTB	21q22.3	0.355649	0.000778094	0.0268108
RAB2B	14q11.2	0.357436	0.000784305	0.0268108
U2AF1	21q22.3	0.355309	0.000787829	0.0268108
DDX21	10q22.1	0.355253	0.000789462	0.0268108
TRADD	16q22.1	0.468085	0.000793677	0.0268108
RPL15	3p24.2	0.354517	0.000810977	0.0272219
EIF1	17q21.2	0.360459	0.000815674	0.0272219
COMMD8	4p12	0.648221	0.000822708	0.0272922
FNTA	8p11.21	0.361914	0.000834843	0.02753
MPST	22q12.3	0.353102	0.000853859	0.0276556
RPL5	1p22.1	0.353064	0.00085503	0.0276556
HSD17B4	5q23.1	0.353045	0.000855616	0.0276556
UBE2I	16p13.3	0.354876	0.000860636	0.0276556
ANXA4	2p13.3	0.352781	0.000863861	0.0276556
SAR1A	10q22.1	0.35263	0.000868605	0.0276556
EIF3A	10q26.11	0.352347	0.000877564	0.0277558
SSR4	Xq28	0.352215	0.000881774	0.0277558
GALC	14q31.3	0.656691	0.000900998	0.0282007
RHOB	2p24.1	0.351158	0.000916117	0.0284471
TP53RK	20q13.12	0.632174	0.00091914	0.0284471
RPS10	6p21.31	0.3498	0.00096206	0.0296101
RPS5	19q13.43	0.349177	0.00098381	0.0300449
TIMM50	19q13.2	0.348837	0.00099586	0.0300449
ANXA10	4q32.3	0.354834	0.000996671	0.0300449
CD44	11p13	0.348781	0.000997882	0.0300449
TUBG1	17q21.2	0.395721	0.00100622	0.0301321
WDR61	15q25.1	0.351524	0.00104248	0.0308852
CYB5B	16q22.1	0.348974	0.00106301	0.0308852
UBA5	3q22.1	0.415546	0.00106432	0.0308852
SART3	12q23.3	0.346535	0.00108114	0.0308852
SLC44A2	19p13.2	0.390654	0.00108165	0.0308852
NOSIP	19q13.33	0.402266	0.00108235	0.0308852
PES1	22q12.2	0.35879	0.00108252	0.0308852
TUBA1C	12q13.12	0.346497	0.00108259	0.0308852
GBE1	3p12.2	0.362991	0.00108976	0.0308852
RBM3	Xp11.23	0.452653	0.00109219	0.0308852
EEF1A1	6q13	0.346026	0.00110089	0.0308852
RDX	11q22.3	0.345969	0.0011031	0.0308852
LARS	5q32	0.34595	0.00110384	0.0308852
TMEM33	4p13	0.345611	0.00111722	0.0311025
MTPAP	10p11.23	0.371314	0.00112569	0.0311815
CRKL	22q11.21	0.349195	0.00113153	0.0311874
IPO11	5q12.1	0.612308	0.00114071	0.031232
RPL7	8q21.11	0.344912	0.00114518	0.031232
UBA1	Xp11.3	0.344743	0.00115208	0.031232
PRDX2	19p13.13	0.344648	0.00115593	0.031232
LRRC59	17q21.33	0.344516	0.00116133	0.031232
HNRNPH1	5q35.3	0.344139	0.00117691	0.0314301
IDH3A	15q25.1	0.344063	0.00118005	0.0314301
NACA	12q13.3	0.343724	0.00119426	0.0314555
ALG2	9q22.33	0.362348	0.00120207	0.0314555
CHORDC1	11q14.3	0.374204	0.001203	0.0314555
VPS4B	18q21.33	0.343365	0.00120943	0.0314555
UBE2L3	22q11.21	0.343214	0.00121587	0.0314555
RARS	5q34	0.343214	0.00121587	0.0314555
DBT	1p21.2	0.348978	0.00122319	0.0314555
CFL1	11q13.1	0.342818	0.00123293	0.0314555
ALG1	16p13.3	0.492683	0.00123932	0.0314555
JAGN1	3p25.3	0.363664	0.00124167	0.0314555
RPS10-NUDT3	6p21.31	0.342441	0.00124937	0.0314555
TOR1AIP2	1q25.2	0.356597	0.00125651	0.0314555
TMX2	11q12.1	0.350138	0.00126112	0.0314555
ATP1B3	3q23	0.342158	0.00126183	0.0314555
SNRPG	2p13.3	0.347781	0.00127484	0.0314555
HMOX2	16p13.3	0.36974	0.00128443	0.0314555
CALU	7q32.1	0.343424	0.00129181	0.0314555
PPP4C	16p11.2	0.357908	0.00129445	0.0314555
NECTIN2	19q13.32	0.43819	0.00129971	0.0314555
EEF1G	11q12.3	0.34129	0.00130076	0.0314555
ATP5MF-PTCD1	7q22.1	0.345186	0.00130115	0.0314555
EIF2S3	Xp22.11	0.341176	0.00130592	0.0314555
RCE1	11q13.2	0.521569	0.00131298	0.0314734
RPL35	9q33.3	0.340912	0.00131802	0.0314734
LACTB	15q22.2	0.342447	0.00133642	0.0315282
RPL30	8q22.2	0.340497	0.00133725	0.0315282
VAPA	18p11.22	0.340441	0.00133989	0.0315282
WDR91	7q33	0.729412	0.00134308	0.0315282
EIF4EBP2	10q22.1	0.651948	0.00136298	0.0317343
PROX1	1q32.3	-0.811189	0.00136332	0.0317343
SEH1L	18p11.21	0.394249	0.00138788	0.0321708
CSNK2A1	20p13	0.33895	0.00141117	0.0325744
PABPC1	8q22.3	0.338308	0.00144289	0.0331684
PPIF	10q22.3	0.339926	0.00145805	0.0332714
NUTF2	16q22.1	0.352069	0.00146305	0.0332714
CCT2	12q15	0.33778	0.00146949	0.0332714
SERPINB9	6p25.2	0.339574	0.0014758	0.0332714
TARDBP	1p36.22	0.337535	0.00148199	0.0332714
SND1	7q32.1	0.337403	0.00148877	0.0332714
KRT19	17q21.2	0.337384	0.00148974	0.0332714
NUP155	5p13.2	0.337176	0.00150044	0.0332714
CCT5	5p15.2	0.337157	0.00150142	0.0332714
HDHD5	22q11.1	0.336101	0.00155703	0.0341135
GNPAT	1q42.2	0.363631	0.00156558	0.0341135
RPS18	6p21.32	0.335874	0.00156919	0.0341135
HSP90AA1	14q32.31	0.335723	0.00157734	0.0341135
TOMM40	19q13.32	0.335723	0.00157734	0.0341135
PSMD2	3q27.1	0.335648	0.00158143	0.0341135
TRMT5	14q23.1	0.688338	0.0015871	0.0341135
POGLUT3	11q22.3	0.37573	0.0015915	0.0341135
PABPC4	1p34.3	0.335327	0.00159893	0.0341135
SNRPD1	18q11.2	0.335289	0.00160099	0.0341135
NIPSNAP1	22q12.2	0.336603	0.00163362	0.0346421
ADI1	2p25.3	0.541935	0.00163831	0.0346421
ATP5F1B	12q13.3	0.334403	0.00165033	0.0346765
MVP	16p11.2	0.334365	0.00165246	0.0346765
PPP6C	9q33.3	0.347371	0.00170932	0.0356726
EIF3B	7p22.3	0.333308	0.0017131	0.0356726
C15ORF48	15q21.1	0.338882	0.00172547	0.0356726
SLC44A4	6p21.33	0.420335	0.00172635	0.0356726
DYNLL1	12q24.31	0.338735	0.00173399	0.0356726
TIMM23	10q11.22	0.351096	0.00174345	0.0356726
SRSF10	1p36.11	0.338546	0.00174499	0.0356726
PGK1	Xq21.1	0.331987	0.00179172	0.0363893
DDX5	17q23.3	0.331855	0.00179976	0.0363893
TUBA1A	12q13.12	0.331855	0.00179976	0.0363893
ANPEP	15q26.1	0.401089	0.00180698	0.0364
ZC3H7B	22q13.2	0.698529	0.00181343	0.0364
PSMC3	11p11.2	0.331365	0.0018299	0.036545
RPS7	2p25.3	0.33127	0.00183575	0.036545
RPL18	19q13.33	0.331195	0.00184044	0.036545
ATP6V1A	3q13.31	0.330836	0.00186287	0.0368583
SELENOF	1p22.3	0.330591	0.00187836	0.0370325
RPLP2	11p15.5	0.330478	0.00188555	0.0370424
FKBP4	12p13.33	0.329383	0.00195632	0.0382969
FIS1	7q22.1	0.331151	0.00196349	0.0383018
CHP1	15q15.1	0.332125	0.00202539	0.0393124
USO1	4q21.1	0.328289	0.00202948	0.0393124
INTS3	1q21.3	0.42181	0.00204989	0.0395693
PTRH2	17q23.1	0.329334	0.0020861	0.0400248
NME2	17q21.33	0.32744	0.00208793	0.0400248
NCDN	1p34.3	0.387886	0.00219713	0.0418311
DDX47	12p13.1	0.331472	0.00220529	0.0418311
ITPK1	14q32.12	0.397394	0.00220656	0.0418311
AMDHD2	16p13.3	0.79021	0.00222314	0.0418311
ARFGAP1	20q13.33	0.32925	0.00222701	0.0418311
RPLP0	12q24.23	0.325496	0.00222747	0.0418311
TM9SF2	13q32.3	0.325213	0.00224847	0.0419326
GUF1	4p12	0.410418	0.00227056	0.0419326
SSR1	6p24.3	0.324893	0.00227249	0.0419326
NAPA	19q13.32-q13.33	0.324685	0.00228816	0.0419326
YARS	1p35.1	0.32461	0.00229388	0.0419326
MALT1	18q21.32	0.474089	0.00229673	0.0419326
KPNA4	3q25.33	0.324572	0.00229675	0.0419326
KRT1	12q13.13	0.324478	0.00230392	0.0419326
ATP6V0A1	17q21.2	0.413472	0.00231354	0.0419326
SPTAN1	9q34.11	0.324308	0.00231689	0.0419326
SF3B3	16q22.1	0.324251	0.00232123	0.0419326
PLOD1	1p36.22	0.32607	0.0023237	0.0419326
SPON1	11p15.2	0.518695	0.00235394	0.0423403
OAS1	12q24.13	0.551177	0.00236644	0.0424275
TOR4A	9q34.3	0.359883	0.00238734	0.0426564
RPL10A	6p21.31	0.323308	0.00239461	0.0426564
SDR16C5	8q12.1	0.359152	0.00244026	0.0433302
RPS16	19q13.2	0.322308	0.00247466	0.0437661
COPB1	11p15.2	0.322157	0.00248695	0.0437661
UGT1A10	2q37.1	-0.52379	0.00249327	0.0437661
RBBP4	1p35.1	0.323881	0.00249641	0.0437661
TUBA4A	2q35	0.321402	0.00254923	0.0443382
RPL7A	9q34.2	0.321364	0.00255238	0.0443382
NEDD4	15q21.3	0.350344	0.00255305	0.0443382
PSMA7	20q13.33	0.321062	0.00257771	0.0446266
EIF3D	22q12.3	0.320817	0.00259846	0.0448456
PUS1	12q24.33	0.322376	0.00262174	0.0451069
ANXA11	10q22.3	0.320345	0.00263877	0.0452594
NSDHL	Xq28	0.327652	0.00265684	0.0453699
VPS35	16q11.2	0.320081	0.00266159	0.0453699
RPS23	5q14.2	0.319647	0.00269947	0.045838
GLTP	12q24.11	0.573846	0.0027056	0.045838
LAMTOR3	4q23	0.33711	0.00271732	0.0458961
ABHD16A	6p21.33	0.324126	0.00279627	0.0468205
HSP90AB1	6p21.1	0.318496	0.00280228	0.0468205
CYC1	8q24.3	0.318458	0.00280571	0.0468205
HNRNPA2B1	7p15.2	0.318383	0.00281258	0.0468205
ERP44	9q31.1	0.318364	0.0028143	0.0468205
SNRNP200	2q11.2	0.318157	0.00283328	0.0469298
NARS	18q21.31	0.318062	0.00284195	0.0469298
PFDN6	6p21.32	0.327439	0.00284628	0.0469298
PELP1	17p13.2	0.317873	0.00285935	0.0470054
CYB5R2	11p15.4	0.339488	0.00288526	0.0471625
S100A11	1q21.3	0.317553	0.00288916	0.0471625
HSPA14	10p13	0.317496	0.00289445	0.0471625
CLIP2	7q11.23	0.348223	0.00292192	0.0474705
TRAP1	16p13.3	0.316704	0.0029694	0.0479959
HPX	11p15.4	0.31659	0.00298025	0.0479959
GOT1	10q24.2	0.31659	0.00298025	0.0479959
SKP1	5q31.1	0.321901	0.00300135	0.0481956
SPTBN1	2p16.2	0.316175	0.00302033	0.0483603
COPZ1	12q13.13	0.316005	0.00303687	0.048391
TUBB2A	6p25.2	0.31593	0.00304425	0.048391
ECHS1	10q26.3	0.315836	0.00305349	0.048391
PSMD5	9q33.2	0.315798	0.00305719	0.048391
EIF5B	2q11.2	0.315383	0.0030982	0.0489003
SHMT2	12q13.3	0.314949	0.0031416	0.0494444
PGD	1p36.22	0.314854	0.0031511	0.0494536
PARS2	1p32.3	0.498329	0.0031628	0.0494969
ACTR2	2p14	0.313647	0.00327507	0.0511096
G6PD	Xq28	0.313345	0.00330674	0.0514588
HMGB1	13q12.3	0.312968	0.00334671	0.051852
RPS28	19p13.2	0.31293	0.00335073	0.051852
HNRNPC	14q11.2	0.312609	0.00338508	0.0520926
TMED9	5q35.3	0.312609	0.00338508	0.0520926
PRMT1	19q13.33	0.312137	0.00343616	0.0527322
RPL27A	11p15.4	0.311873	0.00346507	0.0528189
COPS3	17p11.2	0.317241	0.00347504	0.0528189
WAS	Xp11.23	0.524631	0.00348101	0.0528189
SYNCRIP	6q14.3	0.311722	0.00348168	0.0528189
BCAS2	1p13.2	0.315258	0.00348948	0.0528189
ESYT2	7q36.3	0.311269	0.00353196	0.0533162
LZIC	1p36.22	0.361943	0.0035588	0.0535754
ZRANB2	1p31.1	0.619549	0.00357585	0.0536862
SEC23IP	10q26.11-q26.12	0.310722	0.00359357	0.0538065
TRAM1	8q13.3	0.327672	0.00362523	0.0541342
HNRNPR	1p36.12	0.310345	0.00363662	0.0541583
PSMC6	14q22.1	0.309552	0.00372853	0.0553782
RAB10	2p23.3	0.309458	0.00373961	0.0553899
SYK	9q22.2	0.402449	0.00376294	0.0553899
KRT7	12q13.13	0.309194	0.00377079	0.0553899
HSP90B1	12q23.3	0.309118	0.00377974	0.0553899
MATR3	5q31.2	0.308873	0.00380896	0.0553899
KRT18	12q13.13	0.308798	0.00381799	0.0553899
GRPEL1	4p16.1	0.312322	0.00382423	0.0553899
GARS	7p14.3	0.308741	0.00382477	0.0553899
SEC61A1	3q21.3	0.312281	0.00382904	0.0553899
TUBB4B	9q34.3	0.308703	0.0038293	0.0553899
SETD9	5q11.2	0.880952	0.00385032	0.0555489
PPA1	10q22.1	0.30842	0.00386343	0.0555586
TMX4	20p12.3	0.390179	0.00387392	0.0555586
TUBB4A	19p13.3	0.308062	0.00390704	0.0555586
HSD17B11	4q22.1	0.308062	0.00390704	0.0555586
HNRNPU	1q44	0.308043	0.00390935	0.0555586
TRIM28	19q13.43	0.307948	0.00392091	0.0555586
ICA1	7p21.3	0.696429	0.00392119	0.0555586
KHDRBS1	1p35.2	0.309517	0.00394534	0.0557582
AIMP2	7p22.1	0.307458	0.00398149	0.0561155
LGALS3	14q22.3	0.307382	0.00399089	0.0561155
TXN2	22q12.3	0.314461	0.00401191	0.0562684
HSPA9	5q31.2	0.307081	0.00402866	0.0562975
YBX3	12p13.2	0.306967	0.00404291	0.0562975
GPD1	12q13.12	0.444653	0.00404448	0.0562975
PPP1CB	2p23.2	0.306552	0.00409554	0.0568654
ENO2	12p13.31	0.306401	0.00411483	0.0569903
DCTD	4q35.1	0.414863	0.00414735	0.0572975
PNPLA6	19p13.2	0.348293	0.00415948	0.057301
BAG6	6p21.33	0.305986	0.00416829	0.057301
NCLN	19p13.3	0.307641	0.00418163	0.0573196
PDIA6	2p25.1	0.305816	0.00419033	0.0573196
RPS3A	4q31.3	0.305194	0.00427207	0.0582938
TST	22q12.3	0.304816	0.00432229	0.0588342
UBE2R2	9p13.3	0.368913	0.00437656	0.0593157
SLC39A14	8p21.3	0.31346	0.00437908	0.0593157
RABAC1	19q13.2	0.416469	0.00443161	0.0598108
HSPA5	9q33.3	0.303967	0.00443722	0.0598108
TCERG1	5q32	0.307077	0.00449403	0.0604294
LRRC1	6p12.1	0.305179	0.00451085	0.0605087
PIH1D1	19q13.33	0.387518	0.00453502	0.060686
NIP7	16q22.1	0.434146	0.00456743	0.0609725
PHB	17q21.33	0.302797	0.00460003	0.0610376
AACS	12q24.31	0.402193	0.00460027	0.0610376
TUBB	6p21.33	0.30276	0.00460537	0.0610376
UPF1	19p13.11	0.302571	0.00463214	0.061246
NUDC	1p36.11	0.304084	0.00466442	0.0615259
PLBD1	12p13.1	0.309368	0.00468151	0.0616046
NAP1L1	12q21.2	0.302099	0.00469969	0.0616974
FH	1q43	0.301854	0.00473516	0.0617576
UBXN1	11q12.3	0.307082	0.00474592	0.0617576
SRP68	17q25.1	0.301778	0.00474613	0.0617576
RAB2A	8q12.1-q12.2	0.30176	0.00474887	0.0617576
RPLP1	15q23	0.301476	0.0047902	0.0617861
YWHAE	17p13.3	0.301476	0.0047902	0.0617861
HSPA2	14q23.3	0.30142	0.0047985	0.0617861
KLHL26	19p13.11	-0.942857	0.00480466	0.0617861
NANS	9q22.33	0.301363	0.00480682	0.0617861
SF1	11q13.1	0.302853	0.00484273	0.0621036
QTRT2	3q13.31	0.471658	0.00486296	0.0622189
GPRC5A	12p13.1	0.361718	0.00487827	0.062271
ENOPH1	4q21.22	0.311111	0.00497055	0.0633031
EIF2B2	14q24.3	0.354786	0.00502333	0.0638285
METAP1	4q23	0.312415	0.00506184	0.0639596
GEMIN5	5q33.2	0.351615	0.0050729	0.0639596
YME1L1	10p12.1	0.343575	0.00507724	0.0639596
PAICS	4q12	0.299552	0.00507982	0.0639596
PSMD7	16q23.1	0.299439	0.00509733	0.0639856
LGALS3BP	17q25.3	0.299325	0.0051149	0.0639856
MYDGF	19p13.3	0.314002	0.00511654	0.0639856
THRAP3	1p34.3	0.300723	0.00516558	0.064314
RPS4Y1	Yp11.2	0.298854	0.00518866	0.064314
RPN2	20q11.23	0.298741	0.0052065	0.064314
HSDL2	9q32	0.298722	0.00520948	0.064314
DLST	14q24.3	0.298665	0.00521843	0.064314
TXNDC17	17p13.1	0.298627	0.0052244	0.064314
RER1	1p36.32	0.325744	0.00523425	0.064314
SLC4A1	17q21.31	0.303808	0.00523567	0.064314
COL8A1	3q12.1	0.521368	0.00529007	0.0648384
SEC23A	14q21.1	0.297835	0.00535122	0.0654431
RPS12	6q23.2	0.297759	0.00536344	0.0654481
HKDC1	10q22.1	0.300618	0.00546104	0.0664926
DYSF	2p13.2	0.298671	0.00549449	0.0665115
CROT	7q21.12	0.441733	0.00549525	0.0665115
DNAJB1	19p13.12	0.296891	0.00550574	0.0665115
CRYZ	1p31.1	0.298573	0.00551061	0.0665115
STRAP	12p12.3	0.296552	0.00556233	0.0669898
ETFB	19q13.41	0.296439	0.00558131	0.0670726
SRP14	15q15.1	0.296269	0.00560989	0.0670887
PSMD9	12q24.31	0.301352	0.00563186	0.0670887
GNG12	1p31.3	0.296137	0.0056322	0.0670887
CKMT1A	15q15.3	0.297674	0.00566084	0.0670887
SEC13	3p25.3	0.295948	0.00566421	0.0670887
ATP5F1A	18q21.1	0.295929	0.00566742	0.0670887
RAB14	9q33.2	0.295929	0.00566742	0.0670887
SORD	15q21.1	0.295816	0.00568672	0.0671736
DDRGK1	20p13	0.295514	0.00573845	0.0676405
CAND1	12q14.3-q15	0.295288	0.00577753	0.0679565
H2AFX	11q23.3	0.295193	0.00579388	0.0680045
SMAP1	6q13	0.351987	0.0058159	0.0681186
VAPB	20q13.32	0.294552	0.00590616	0.0688982
CHMP7	8p21.3	0.404084	0.00590734	0.0688982
LAMTOR1	11q13.4	0.296091	0.00593422	0.0689446
IDH2	15q26.1	0.294382	0.0059362	0.0689446
POTEJ	2q21.1	0.294042	0.00599669	0.0693305
ALDOC	17q11.2	0.294023	0.00600007	0.0693305
PUDP	Xp22.31	0.342406	0.00601603	0.0693305
PIGK	1p31.1	0.369087	0.0060241	0.0693305
QKI	6q26	0.620227	0.006032	0.0693305
PSMD6	3p14.1	0.293646	0.00606795	0.0695993
SRSF11	1p31.1	0.293514	0.00609187	0.0696509
DNM2	19p13.2	0.293382	0.00611587	0.0696509
HNRNPDL	4q21.22	0.293344	0.00612274	0.0696509
PGK2	6p12.3	0.293344	0.00612274	0.0696509
EDC3	15q24.1	0.481048	0.00615253	0.0697957
RCC1	1p35.3	0.293136	0.00616067	0.0697957
TWF1	12q12	0.294645	0.00619412	0.0698965
DNM1L	12p11.21	0.292891	0.00620575	0.0698965
TXNDC12	1p32.3	0.297867	0.00623948	0.0698965
RPL17	18q21.1	0.292684	0.00624413	0.0698965
POGLUT1	3q13.33	0.321529	0.0062537	0.0698965
EIF2S2	20q11.22	0.292589	0.00626165	0.0698965
NUP37	12q23.2	0.340774	0.00627666	0.0698965
ETFA	15q24.2-q24.3	0.292476	0.00628272	0.0698965
NOM1	7q36.3	0.465909	0.00628311	0.0698965
PEBP1	12q24.23	0.292136	0.00634632	0.0703181
SLC9A3R2	16p13.3	0.458824	0.0063464	0.0703181
RPL26L1	5q35.1	0.293649	0.00637905	0.0705388
USP15	12q14.1	0.348208	0.00640369	0.070579
GATD1	11p15.5	0.373346	0.00640817	0.070579
RPL12	9q33.3	0.291665	0.00643559	0.0707405
GLRX5	14q32.13	0.293219	0.00646032	0.0708716
TUBB6	18p11.21	0.291287	0.00650781	0.0712199
HSPA8	11q24.1	0.291136	0.0065369	0.0712199
GDI2	10p15.1	0.291118	0.00654054	0.0712199
CLIC3	9q34.3	0.734266	0.00654349	0.0712199
TSNAX	1q42.2	-0.305353	0.0065575	0.0712325
MARS	12q13.3	0.290834	0.00659542	0.0715041
MSI2	17q22	0.294077	0.0066237	0.0716705
MYO1G	7p13	0.304822	0.00665663	0.0718864
CLIC1	6p21.33	0.290268	0.00670639	0.0722828
SERPINB8	18q22.1	0.293571	0.00672219	0.0722851
PSIP1	9p22.3	0.318813	0.0067327	0.0722851
EHHADH	3q27.2	0.289853	0.00678881	0.0726465
XRCC6	22q13.2	0.289834	0.00679257	0.0726465
TMCO1	1q24.1	0.291382	0.00681794	0.0727772
CLPTM1L	5p15.33	0.499179	0.00684638	0.0729403
RPL27	17q21.31	0.289363	0.00688737	0.0732361
CDH17	8q22.1	0.294362	0.00690849	0.0732423
PSMD8	19q13.2	0.289193	0.00692178	0.0732423
S100A16	1q21.3	0.299648	0.00692761	0.0732423
EPS8L3	1p13.3	0.297742	0.00694348	0.0732702
NPM3	10q24.32	0.535652	0.00698318	0.0733359
PLVAP	19p13.11	0.339276	0.00698376	0.0733359
CRK	17p13.3	0.290522	0.00699126	0.0733359
CCT6A	7p11.2	0.288797	0.00700265	0.0733359
ATPAF1	1p33	0.326323	0.00703873	0.073441
CASP3	4q35.1	0.308734	0.0070392	0.073441
ABRACL	6q24.1	0.290131	0.00707131	0.0736373
FAM3C	7q31.31	0.291708	0.00709585	0.0736594
POR	7q11.23	0.288325	0.00710002	0.0736594
HDHD3	9q32	0.291526	0.00713337	0.0738671
AMACR	5p13.2	0.358369	0.00721908	0.0745106
PKM	15q23	0.28774	0.00722242	0.0745106
SLC9A3R1	17q25.1	0.289252	0.0072544	0.0747014
AIF1	6p21.33	0.354819	0.00729102	0.0748093
SH3GLB2	9q34.11	0.305455	0.00729188	0.0748093
CBWD1	9p24.3	0.472177	0.00731906	0.0749493
HIST2H2AA3	1q21.2	0.287174	0.00734263	0.075052
TRAPPC2L	16q24.3	0.451184	0.00740151	0.0755145
G3BP2	4q21.1	0.28847	0.00742064	0.0755705
CAB39L	13q14.2	0.290048	0.0074442	0.0756152
USP5	12p13.31	0.286664	0.00745233	0.0756152
KPNA1	3q21.1	0.286514	0.00748511	0.0758089
TPT1	13q14.13	0.286419	0.00750566	0.0758784
HADH	4q25	0.286287	0.00753451	0.0760313
RAD23B	9q31.2	0.28591	0.00761749	0.0764928
EIF3C	16p11.2	0.28591	0.00761749	0.0764928
SLC25A4	4q35.1	0.285891	0.00762166	0.0764928
LETM1	4p16.3	0.285796	0.00764254	0.0765636
SPATA20	17q21.33	0.405397	0.00773517	0.0773189
CHID1	11p15.5	0.290374	0.00774585	0.0773189
GLRX3	10q26.3	0.285193	0.00777738	0.077494
RTN3	11q13.1	0.313112	0.00784402	0.0778194
ACADVL	17p13.1	0.284815	0.0078627	0.0778194
TMX1	14q22.1	0.284815	0.0078627	0.0778194
LSM14B	20q13.33	0.331941	0.00786622	0.0778194
BSG	19p13.3	0.284702	0.00788846	0.0779003
APOO	Xp22.11	0.284551	0.00792292	0.0781014
PSMD3	17q21.1	0.284438	0.00794885	0.0782179
DHX9	1q25.3	0.284287	0.00798355	0.0783664
HSPE1	2q33.1	0.284249	0.00799224	0.0783664
KPNA6	1p35.2	0.284098	0.0080271	0.0785691
NT5C2	10q24.32-q24.33	0.307849	0.00806004	0.0787525
FASN	17q25.3	0.283834	0.00808842	0.0788906
HIST1H2AC	6p22.2	0.283664	0.00812806	0.0791379
NPM1	5q35.1	0.283551	0.00815458	0.0792568
DTNA	18q12.1	0.473637	0.00819803	0.0795267
METTL26	16p13.3	0.412195	0.008219	0.0795267
CA12	15q22.2	0.385014	0.00823838	0.0795267
MEPCE	7q22.1	0.72028	0.00823977	0.0795267
ATP6V1B2	8p21.3	0.283004	0.00828385	0.0798131
VPS11	11q23.3	0.346318	0.0083168	0.0799915
RPS17	15q25.2	0.282721	0.00835141	0.0800346
CSDE1	1p13.2	0.282664	0.00836498	0.0800346
PPP2R2A	8p21.2	0.282664	0.00836498	0.0800346
KDELR1	19q13.33	0.585965	0.00837907	0.0800346
ITPA	20p13	0.29445	0.00843644	0.0803191
MTFR1	8q13.1	-0.745455	0.00845473	0.0803191
RPS9	19q13.42	0.282287	0.00845595	0.0803191
YKT6	7p13	0.292499	0.00846685	0.0803191
RPS21	20q13.33	0.282098	0.00850175	0.0805123
CTH	1p31.1	0.415182	0.00858198	0.0811334
YTHDF1	20q13.33	0.325595	0.00865514	0.0816857
RPS14	5q33.1	0.280928	0.00879066	0.0828235
CNDP2	18q22.3	0.280853	0.00880959	0.082861
RRP12	10q24.1	0.285609	0.00886223	0.0832149
LGALS8	1q43	0.304177	0.0088876	0.0833119
MDH2	7q11.23	0.280343	0.00893831	0.0836392
STK24	13q32.2	0.280287	0.00895272	0.0836392
GOLGA2	9q34.11	0.281649	0.00901926	0.0838001
ANXA5	4q27	0.280023	0.0090202	0.0838001
PLEKHA6	1q32.1	-0.337113	0.00902988	0.0838001
DYNLL2	17q22	0.284938	0.00903045	0.0838001
KRT4	12q13.13	0.279758	0.00908814	0.0841945
IPO5	13q32.2	0.279268	0.00921549	0.0852318
RABEP1	17p13.2	0.439572	0.00929057	0.0857829
NIPSNAP3A	9q31.1	0.288983	0.00932834	0.085846
HDGF	1q23.1	0.280418	0.00933798	0.085846
UFD1	22q11.21	0.278758	0.0093494	0.085846
EEF1B2	2q33.3	0.278721	0.00935938	0.085846
SEC11A	15q25.2-q25.3	0.317316	0.00942898	0.0861967
GRSF1	4q13.3	0.286766	0.00944431	0.0861967
TXNRD1	12q23.3	0.278343	0.00945976	0.0861967
COMMD5	8q24.3	0.367143	0.00945985	0.0861967
GPC6	13q31.3-q32.1	0.337845	0.00949519	0.0863766
FMNL3	12q13.12	0.340161	0.00962645	0.0874271
DDX18	2q14.1	0.277551	0.00967363	0.0875685
ENO1	1p36.23	0.277551	0.00967363	0.0875685
HMGB2	4q34.1	0.277456	0.00969937	0.0876551
RPS19	19q13.2	0.2774	0.00971484	0.0876551
ERP29	12q24.13	0.277249	0.00975621	0.0878852
PSMB5	14q11.2	0.34531	0.00982224	0.0883364
PUF60	8q24.3	0.276872	0.0098603	0.0885349
UTP25	1q32.2	0.462959	0.0099879	0.0895355
DIAPH1	5q31.3	0.277897	0.0100215	0.0896917
SMAD5	5q31.1	0.312315	0.0100817	0.0897017
ACO2	22q13.2	0.275985	0.0101087	0.0897017
SEL1L3	4p15.2	0.477833	0.0101213	0.0897017
MRC1	10p12.33	0.347055	0.0101373	0.0897017
LMAN1	18q21.32	0.275815	0.0101569	0.0897017
XPNPEP1	10q25.1	0.275815	0.0101569	0.0897017
HIST1H2BK	6p22.1	0.275721	0.0101838	0.0897017
OXSR1	3p22.2	0.275683	0.0101946	0.0897017
PGRMC1	Xq24	0.275683	0.0101946	0.0897017
SELENOM	22q12.2	0.417022	0.0102358	0.0897017
H2AFY	5q31.1	0.275494	0.0102485	0.0897017
RPL14	3p22.1	0.275438	0.0102648	0.0897017
ST13	22q13.2	0.2754	0.0102756	0.0897017
COX20	1q44	0.298501	0.0103134	0.0897017
NFYA	6p21.1	0.620588	0.0103135	0.0897017
RBM25	14q24.2	0.323512	0.0103213	0.0897017
C7ORF26	7p22.1	0.681319	0.0103404	0.0897017
CBX3	7p15.2	0.275136	0.0103517	0.0897017
HRG	3q27.3	0.278344	0.0103558	0.0897017
CAPZA1	1p13.2	0.275117	0.0103572	0.0897017
HSPA1A	6p21.33	0.275098	0.0103627	0.0897017
HINT2	9p13.3	0.279879	0.0103897	0.0897953
TXNRD2	22q11.21	0.279816	0.0104077	0.0898106
MRPS17	7p11.2	0.296053	0.0104347	0.0899043
RAP1A	1p13.2	0.274513	0.0105332	0.0906113
ESYT1	12q13.2	0.274268	0.0106054	0.0910912
GSTO1	10q25.1	0.274192	0.0106277	0.0911415
UQCRC1	3p21.31	0.274136	0.0106445	0.0911442
ALDH18A1	10q24.1	0.273985	0.0106893	0.0913866
SFXN2	10q24.32	0.329807	0.0107444	0.0917164
SCFD2	4q12	0.431627	0.0108068	0.092107
CNPY2	12q13.3	0.273362	0.0108758	0.0924185
AKR1C3	10p15.1	0.278158	0.0108912	0.0924185
CA1	8q21.2	0.27646	0.0109072	0.0924185
HIST1H2BB	6p22.2	0.273249	0.0109101	0.0924185
EIF3L	22q13.1	0.272985	0.0109903	0.092629
PALD1	10q22.1	0.375626	0.0109988	0.092629
EEF1E1	6p24.3	0.281165	0.0110008	0.092629
RPL19	17q12	0.272947	0.0110018	0.092629
CBR1	21q22.12	0.272683	0.0110826	0.0931678
SPINT1	15q15.1	0.297415	0.0111751	0.0938033
TRIM25	17q22	0.272305	0.0111989	0.0938171
EIF4G1	3q27.1	0.272268	0.0112106	0.0938171
TRAPPC4	11q23.3	0.429488	0.011249	0.0938866
DNM3	1q24.3	0.272079	0.0112693	0.0938866
BOLA2	16p11.2	0.281997	0.0112698	0.0938866
RAB1B	11q13.2	0.27172	0.0113814	0.0944859
ABCF1	6p21.33	0.27172	0.0113814	0.0944859
IFIT5	10q23.31	0.348246	0.0114085	0.0944859
CPOX	3q11.2	0.273168	0.0114225	0.0944859
PPP2R5C	14q32.31	0.27476	0.011427	0.0944859
LARP4	12q13.12	0.34149	0.011498	0.0946842
BOP1	8q24.3	0.279517	0.0114996	0.0946842
NDE1	16p13.11	0.329663	0.0115023	0.0946842
AATF	17q12	0.300359	0.0115251	0.0947319
NCL	2q37.1	0.271211	0.0115424	0.0947331
BAX	19q13.33	0.274294	0.011573	0.0947332
HSPA6	1q23.3	0.27106	0.0115905	0.0947332
SLC27A4	9q34.11	0.335065	0.0115937	0.0947332
GPD2	2q24.1	0.27089	0.0116448	0.0950104
CAPG	2p11.2	0.270588	0.0117419	0.0955792
ISY1	3q21.3	0.526821	0.011766	0.0955792
IARS	9q22.31	0.270513	0.0117662	0.0955792
ATAD3A	1p36.33	0.270305	0.0118335	0.0958919
RBBP7	Xp22.2	0.271859	0.0118394	0.0958919
ELP1	9q31.3	0.31767	0.0118704	0.096003
M6PR	12p13.31	0.286945	0.0119656	0.0965497
TRAF2	9q34.3	0.292669	0.0119815	0.0965497
PUM3	9p24.2	0.322423	0.0119903	0.0965497
ACP2	11p11.2|11p12-p11	0.330568	0.0120225	0.0966578
YBX2	17p13.1	0.271194	0.0120559	0.0966578
VDAC2	10q22.2	0.269626	0.0120561	0.0966578
OAT	10q26.13	0.272654	0.0121004	0.0968729
OCIAD1	4p11	0.270979	0.0121267	0.0969438
RNASE4	14q11.2	0.648352	0.0121442	0.0969438
PLCD1	3p22.2	0.316562	0.0121858	0.097136
RPL18A	19p13.11	0.269116	0.0122253	0.0972125
STAM	10p12.33	0.287937	0.0122443	0.0972125
GSKIP	14q32.2	0.35888	0.0122481	0.0972125
SMCHD1	18p11.32	0.326648	0.012329	0.0973906
TPRKB	2p13.1	0.293492	0.0123445	0.0973906
GMPS	3q25.31	0.270315	0.0123478	0.0973906
RAB5C	17q21.2	0.268739	0.012352	0.0973906
SLC25A5	Xq24	0.26872	0.0123584	0.0973906
TRMT112	11q13.1	0.271803	0.0123819	0.0974375
MTHFD1L	6q25.1	0.274975	0.0124131	0.0975442
ARHGAP17	16p12.1	0.271358	0.0125317	0.0983365
ARPC1B	7q22.1	0.268079	0.0125766	0.0983552
ATG16L1	2q37.1	0.401029	0.0125868	0.0983552
TBC1D15	12q21.1	0.274453	0.0125873	0.0983552
PACSIN2	22q13.2	0.271034	0.0126416	0.09864
GATD3A	21q22.3	0.325479	0.012663	0.0986683
RNH1	11p15.5	0.267701	0.0127064	0.0987703
COPS8	2q37.3	0.267626	0.0127326	0.0987703
GAA	17q25.3	0.400372	0.0127461	0.0987703
ATP5PO	21q22.11	0.267531	0.0127653	0.0987703
CS	12q13.3	0.267531	0.0127653	0.0987703
ERCC3	2q14.3	-0.718182	0.0127996	0.0988495
COPA	1q23.2	0.267399	0.0128112	0.0988495
UBR4	1p36.13	0.267211	0.012877	0.0991831
GNB4	3q26.33	0.267173	0.0128902	0.0991831
ACTR3	2q14.1	0.267022	0.0129432	0.0993297
OLA1	2q31.1	0.266984	0.0129564	0.0993297
DDX1	2p24.3	0.266965	0.0129631	0.0993297
INF2	14q32.33	0.266739	0.0130429	0.0998036
SH3BGRL2	6q14.1	0.272886	0.0131228	0.100276
GIPC2	1p31.1	0.308471	0.0131409	0.100276
ANP32E	1q21.2	0.26793	0.0131704	0.100278
NELFB	9q34.3	0.267911	0.0131773	0.100278
SPR	2p13.2	0.265852	0.0133598	0.101416
SF3B4	1q21.2	0.268908	0.0133838	0.101416
DSEL	18q22.1	0.570691	0.0133843	0.101416
UQCRQ	5q31.1	0.280719	0.0134001	0.101416
PSMB2	1p34.3	0.265588	0.0134555	0.10162
CSNK1A1	5q32	0.268685	0.0134637	0.10162
DDX6	11q23.3	0.265305	0.0135587	0.102197
RPL8	8q24.3	0.265097	0.0136348	0.10251
EDF1	9q34.3	0.274777	0.0136371	0.10251
DDAH1	1p22.3	0.264965	0.0136834	0.102718
CYB5R4	6q14.2	0.554386	0.013769	0.103161
ARL6IP4	12q24.31	0.63956	0.0137796	0.103161
TMEM167A	5q14.2	0.368569	0.0138248	0.103178
SERPINB1	6p25.2	0.264569	0.0138302	0.103178
CLIP1	12q24.31	0.288925	0.0138378	0.103178
BZW2	7p21.1	0.26438	0.0139005	0.103272
JMJD1C	10q21.3	0.685315	0.013906	0.103272
ITFG1	16q12.1	0.467643	0.0139063	0.103272
LAS1L	Xq12	0.275682	0.0139282	0.103296
PARP4	13q12.12	0.263928	0.0140707	0.104213
BANF1	11q13.1	0.265409	0.0140915	0.104228
VPS4A	16q22.1	0.263777	0.0141278	0.104357
TSFM	12q14.1	0.265136	0.0141947	0.104623
TSPAN6	Xq22.1	0.659341	0.0142256	0.104623
GIPC1	19p13.12	0.28202	0.0142333	0.104623
USE1	19p13.11	0.435887	0.0142393	0.104623
EIF5	14q32.32	0.263418	0.0142642	0.104667
EHD4	15q15.1	0.263267	0.014322	0.104908
SAR1B	5q31.1	0.263173	0.0143583	0.104908
EPB41	1p35.3	0.271116	0.014359	0.104908
RAB35	12q24.23	0.263135	0.0143728	0.104908
ATAD3B	1p36.33	0.262701	0.0145406	0.105993
GART	21q22.11	0.262475	0.0146288	0.106496
VKORC1L1	7q11.21	0.277223	0.0146516	0.106522
MTHFD2	2p13.1	0.369677	0.0146944	0.106694
SLC25A6	Xp22.33 and Yp11.2	0.262229	0.0147249	0.106775
GCN1	12q24.23	0.262078	0.0147843	0.107065
SERPINB6	6p25.2	0.261965	0.014829	0.107249
CCDC43	17q21.31	0.523377	0.0149	0.107501
OTUD4	4q31.21	-0.809524	0.0149027	0.107501
OGDH	7p13	0.26172	0.0149262	0.107522
RAB1A	2p14	0.261644	0.0149562	0.107522
FUS	16p11.2	0.261626	0.0149637	0.107522
HERC4	10q21.3	0.480769	0.014984	0.107528
RAB8B	15q22.2	0.261154	0.0151527	0.108597
ABRAXAS2	10q26.13	0.290902	0.0153098	0.109523
WDR82	3p21.2	0.270277	0.0153214	0.109523
CISD2	4q24	0.260588	0.0153821	0.109667
ERLIN1	10q24.31	0.26055	0.0153975	0.109667
BCAT2	19q13.33	0.299344	0.0154186	0.109667
AARS	16q22.1	0.260493	0.0154207	0.109667
FARSB	2q36.1	0.260418	0.0154515	0.109746
MYO1E	15q22.2	0.26154	0.0156137	0.110755
TXNDC5	6p24.3	0.259927	0.0156536	0.110896
HLA-DMB	6p21.32	0.444335	0.0157419	0.111244
SEC24B	4q25	0.264326	0.0157475	0.111244
EIF3K	19q13.2	0.259644	0.0157712	0.111244
GALK1	17q25.1	0.262671	0.015783	0.111244
CCAR2	8p21.3	0.259456	0.01585	0.111575
SMS	Xp22.11	0.267164	0.0159045	0.111705
SIGMAR1	9p13.3	0.357444	0.0159277	0.111705
CERS6	2q24.3	0.476923	0.0159291	0.111705
RPS15A	16p12.3	0.258927	0.0160726	0.112569
LAMTOR2	1q22	0.261679	0.016197	0.113247
SPTLC1	9q22.31	0.268003	0.0162386	0.113247
WASHC5	8q24.13	0.261476	0.0162827	0.113247
DNAJA1	9p21.1	0.25838	0.0163059	0.113247
SETD3	14q32.2	0.306346	0.0163422	0.113247
TWF2	3p21.2	0.259781	0.0163513	0.113247
REEP6	19p13.3	0.276444	0.016357	0.113247
HNRNPAB	5q35.3	0.258191	0.016387	0.113247
RNMT	18p11.21	0.441872	0.0164003	0.113247
CIRBP	19p13.3	0.28002	0.0164215	0.113247
TNIP1	5q33.1	0.516883	0.0164265	0.113247
HSPA4	5q31.1	0.258097	0.0164277	0.113247
BPHL	6p25.2	0.359831	0.0164351	0.113247
PSAT1	9q21.2	0.281851	0.016459	0.113252
MTCH2	11p11.2	0.257984	0.0164767	0.113252
ACAD9	3q21.3	0.25789	0.0165176	0.113294
ADAM15	1q21.3	0.648352	0.0165367	0.113294
EPHA2	1p36.13	0.283602	0.0165441	0.113294
HDGFL3	15q25.2	0.408098	0.0165772	0.113347
SF3B1	2q33.1	0.257663	0.0166161	0.113347
EIF3I	1p35.2	0.259136	0.0166292	0.113347
AP2A1	19q13.33	0.257588	0.016649	0.113347
PGLS	19p13.11	0.257531	0.0166737	0.113347
ANXA1	9q21.13	0.257512	0.016682	0.113347
NDUFAF8	17q25.3	0.515584	0.0167464	0.113347
SNRPD2	19q13.32	0.257342	0.0167564	0.113347
RP2	Xp11.3	0.266737	0.0167694	0.113347
RCN2	15q24.3	0.261849	0.0167906	0.113347
WDR48	3p22.2	0.433148	0.0168034	0.113347
UBQLN2	Xp11.21	0.258726	0.0168081	0.113347
CUL1	7q36.1	0.261786	0.0168179	0.113347
CARHSP1	16p13.2	0.326883	0.0168928	0.113609
RPN1	3q21.3	0.257022	0.0168979	0.113609
SDHC	1q23.3	0.439409	0.0170814	0.114704
CAPZA2	7q31.2	0.256512	0.0171246	0.114855
DYNLRB1	20q11.22	0.259451	0.0171608	0.114892
SPTLC2	14q24.3	0.272645	0.0171812	0.114892
CLNS1A	11q14.1	0.314493	0.0171924	0.114892
UQCRC2	16p12.2	0.256248	0.0172431	0.115011
SEC24C	10q22.2	0.256229	0.0172516	0.115011
EMC10	19q13.33	0.33503	0.0173934	0.115813
MYH14	19q13.33	0.255871	0.0174138	0.115813
ARHGEF7	13q34	0.266821	0.0174531	0.115827
TUBB8	10p15.3	0.255738	0.0174738	0.115827
ATP6V1H	8q11.23	0.257221	0.0174786	0.115827
AFG3L2	18p11.21	0.255455	0.0176031	0.116431
DBNL	7p13	0.255437	0.0176118	0.116431
DCAF7	17q23.3	0.275113	0.017678	0.11673
XRCC5	2q35	0.255191	0.0177246	0.116735
DCTN6	8p12	0.511688	0.0177364	0.116735
UBE2N	12q22	0.255154	0.017742	0.116735
ZNFX1	20q13.13	0.340426	0.0179057	0.117672
HSPD1	2q33.1	0.25472	0.0179432	0.117682
LGMN	14q32.12	0.264018	0.0179603	0.117682
RAB21	12q21.1	0.254644	0.0179784	0.117682
ATP5MG	11q23.3	0.254587	0.0180048	0.117682
EHBP1L1	11q13.1	-0.323819	0.0180134	0.117682
PPIB	15q22.31	0.254455	0.0180666	0.117891
SNRPC	6p21.31	0.261992	0.018142	0.118243
HNRNPH2	Xq22.1	0.254172	0.0181997	0.118376
WDR1	4p16.1	0.254153	0.0182086	0.118376
G3BP1	5q33.1	0.254116	0.0182264	0.118376
DHFR	5q14.1	0.396639	0.0183238	0.118869
MLEC	12q24.31	0.253795	0.0183784	0.119084
DHRS7B	17p11.2	-0.298532	0.018432	0.119291
THOP1	19p13.3	0.258134	0.0184667	0.119376
FAM83H	8q24.3	0.278773	0.0185645	0.119869
FGG	4q32.1	0.253286	0.0186221	0.120101
DDX50	10q22.1	0.253229	0.0186494	0.120137
PTTG1IP	21q22.3	0.374899	0.018695	0.120143
ERO1A	14q22.1	0.253116	0.018704	0.120143
CUX1	7q22.1	0.274528	0.0187514	0.120143
PRDX1	1p34.1	0.252927	0.0187953	0.120143
LPCAT1	5p15.33	0.254387	0.0188037	0.120143
FKBP8	19p13.11	0.258976	0.0188057	0.120143
ACSS3	12q21.31	0.885714	0.0188455	0.120143
C1ORF122	1p34.3	0.885714	0.0188455	0.120143
AURKA	20q13.2	-0.885714	0.0188455	0.120143
OSTF1	9q21.13	0.252738	0.018887	0.120236
FLII	17p11.2	0.252682	0.0189145	0.120236
GOLT1B	12p12.1	0.276031	0.0189252	0.120236
RAB7A	3q21.3	0.25255	0.018979	0.120319
RPL24	3q12.3	0.252512	0.0189975	0.120319
TBC1D23	3q12.1-q12.2	0.364808	0.01902	0.120319
CYFIP1	15q11.2	0.252455	0.0190252	0.120319
SFN	1p36.11	0.252399	0.019053	0.120357
SPTA1	1q23.1	0.318087	0.0190784	0.120381
PLS1	3q23	0.252267	0.0191178	0.120492
PSMD1	2q37.1	0.252172	0.0191643	0.120648
RMDN2	2p22.2	-0.48419	0.019223	0.120848
DDX51	12q24.33	-0.393838	0.0192398	0.120848
PRPF39	14q21.2	0.439518	0.0192733	0.120922
CD2AP	6p12.3	0.251889	0.0193043	0.120979
U2AF2	19q13.42	0.251795	0.0193511	0.121006
SORBS1	10q24.1	-0.256286	0.0193522	0.121006
TPD52L2	20q13.33	0.251701	0.0193981	0.121156
DCPS	11q24.2	0.267614	0.0194316	0.121229
NECAP2	1p36.13	0.347167	0.0194639	0.121293
PIN1	19p13.2	0.311347	0.0195049	0.121396
KIF13A	6p22.3	0.284699	0.0195404	0.121396
ACOT8	20q13.12	0.293539	0.0195471	0.121396
XPO1	2p15	0.251361	0.0195679	0.121396
STIP1	11q13.1	0.25121	0.0196438	0.12173
RPS4X	Xq13.1	0.251059	0.01972	0.121968
DENND2D	1p13.3-p13.2	0.286421	0.0197262	0.121968
ABCE1	4q31.21	0.250965	0.0197677	0.122088
HNRNPL	19q13.2	0.250889	0.0198059	0.122097
RBM12B	8q22.1	0.265077	0.0198146	0.122097
TOMM20	1q42.3	-0.409824	0.0198352	0.122097
TERF2IP	16q23.1	0.277753	0.0199111	0.122428
ZNRD2	11q13.1	0.75	0.0199421	0.122483
RSL1D1	16p13.13	0.250436	0.0200368	0.122928
FKBP2	11q13.1	0.256386	0.0200698	0.122952
GLUD1	10q23.2	0.250342	0.0200851	0.122952
API5	11p12	0.250191	0.0201627	0.123163
CDK6	7q21.2	0.251651	0.020164	0.123163
RAB8A	19p13.11	0.249851	0.0203383	0.124091
SSRP1	11q12.1	0.249757	0.0203873	0.124253
QSOX2	9q34.3	0.301227	0.0204276	0.124362
AARSD1	17q21.31	0.526316	0.0206189	0.125388
TRMT61A	14q32.33	0.589286	0.0207944	0.126317
MRPL4	19p13.2	0.257618	0.0210531	0.12745
KARS	16q23.1	0.248493	0.0210537	0.12745
MFAP2	1p36.13	0.279307	0.0210752	0.12745
RPA1	17p13.3	0.248436	0.021084	0.12745
PSMG4	6p25.2	0.322262	0.0210959	0.12745
GNB1	1p36.33	0.248153	0.0212359	0.128155
ANXA7	10q22.2	0.24804	0.0212969	0.128315
SPRYD4	12q13.3	0.324946	0.0213086	0.128315
LPXN	11q12.1	-0.498701	0.0213808	0.128509
PXN	12q24.23	0.258593	0.0213872	0.128509
FKBP10	17q21.2	0.256751	0.0215054	0.129079
FBL	19q13.2	0.247493	0.021594	0.12947
PCK2	14q11.2-q12	0.247436	0.0216249	0.129516
CRABP1	15q25.1	0.709091	0.0216659	0.129543
UBE2H	7q32.2	0.424631	0.0216762	0.129543
NSUN2	5p15.31	0.247248	0.0217283	0.129605
HSD17B12	11p11.2	0.247172	0.0217698	0.129605
ARF6	14q21.3	0.251585	0.021772	0.129605
PCBP2	12q13.13	0.247153	0.0217801	0.129605
KHSRP	19p13.3	0.246908	0.0219154	0.130238
TMEM173	5q31.2	0.290625	0.0219336	0.130238
FGD4	12p11.21	0.323313	0.0220075	0.130537
RPF2	6q21	0.260582	0.0220857	0.130861
MRPL42	12q22	0.485037	0.0221368	0.131023
SLC25A13	7q21.3	0.246342	0.0222304	0.131437
AGR2	7p21.1	0.246285	0.0222621	0.131454
PMPCB	7q22.1	0.246247	0.0222833	0.131454
SPTBN2	11q13.2	0.24621	0.0223045	0.131454
ABHD11	7q11.23	0.24743	0.022428	0.131987
PDXDC1	16p13.11	0.245964	0.0224425	0.131987
EIF6	20q11.22	0.247293	0.0225048	0.132213
EMG1	12p13.31	0.266722	0.0225464	0.132222
SRSF3	6p21.31-p21.2	0.245757	0.0225599	0.132222
PHF6	Xq26.2	-0.364372	0.022578	0.132222
SRP9	1q42.12	0.245663	0.0226135	0.13229
PARK7	1p36.23	0.245323	0.0228071	0.133195
AKR7A3	1p36.13	0.254266	0.0228473	0.133195
RBMX	Xq26.3	0.245229	0.0228612	0.133195
MAP2K1	15q22.31	0.24957	0.0228856	0.133195
PRMT3	11p15.1	0.378121	0.0229771	0.133195
EXD2	14q24.1	0.277516	0.0229853	0.133195
RAP1B	12q15	0.245002	0.0229913	0.133195
RANBP1	22q11.21	0.246414	0.0230043	0.133195
KRT5	12q13.13	0.244964	0.0230131	0.133195
PIP4K2C	12q13.3	0.257173	0.0230263	0.133195
JUP	17q21.2	0.244927	0.0230348	0.133195
LGALS4	19q13.2	0.244889	0.0230566	0.133195
NUP160	11p11.2	0.248772	0.0233396	0.134445
HSPA4L	4q28.1	0.244398	0.0233414	0.134445
SCARB2	4q21.1	0.244323	0.0233855	0.134445
CRNKL1	20p11.23	0.268846	0.0233876	0.134445
YBX1	1p34.2	0.244285	0.0234076	0.134445
RTCA	1p21.2	0.244266	0.0234186	0.134445
CAPZB	1p36.13	0.244115	0.0235071	0.134487
MROH1	8q24.3	0.340944	0.0235253	0.134487
BRK1	3p25.3	0.294565	0.023532	0.134487
RCN1	11p13	0.243983	0.0235848	0.134487
UHRF2	9p24.1	-0.412236	0.0235929	0.134487
TJP1	15q13.1	0.245398	0.0235932	0.134487
PPIA	7p13	0.243964	0.0235959	0.134487
PLEKHA5	12p12.3	0.450769	0.023732	0.135123
CYB5R3	22q13.2	0.243662	0.0237743	0.135214
ELAVL1	19p13.2	0.243625	0.0237967	0.135214
PRKCA	17q24.2	0.260683	0.0238914	0.135488
TUBB3	16q24.3	0.243455	0.0238976	0.135488
DOLPP1	9q34.11	0.304257	0.0239184	0.135488
SLC27A1	19p13.11	0.514035	0.0243561	0.137787
NEB	2q23.3	0.295395	0.0243738	0.137787
GOT2	16q21	0.242115	0.0247068	0.139526
STXBP2	19p13.2	0.250867	0.024798	0.139874
SFRP4	7p14.1	0.447692	0.0248243	0.139874
NOP2	12p13.31	0.24187	0.0248574	0.139874
PLIN2	9p22.1	0.313937	0.0248694	0.139874
SFXN1	5q35.2	0.241738	0.0249389	0.140123
EFTUD2	17q21.31	0.241681	0.0249738	0.140177
CFL2	14q13.1	0.241625	0.0250088	0.140232
ALDOA	16p11.2	0.241493	0.0250907	0.14039
PHPT1	9q34.3	0.251923	0.02511	0.14039
CDS2	20p12.3	0.279853	0.025113	0.14039
AGAP1	2q37.2	0.615385	0.0251671	0.140506
ASPH	8q12.3	0.241342	0.0251845	0.140506
RHOT1	17q11.2	0.265459	0.0252599	0.140785
EIF3M	11p13	0.242466	0.0253645	0.141225
COPG1	3q21.3	0.241002	0.0253968	0.141263
FKBP3	14q21.2	0.240945	0.0254323	0.141295
C1ORF198	1q42.2	-0.539216	0.0255037	0.141295
NOS2	17q11.2	0.539216	0.0255037	0.141295
FASTKD1	2q31.1	0.421456	0.0255045	0.141295
HDLBP	2q37.3	0.240681	0.0255986	0.141449
YWHAH	22q12.3	0.240681	0.0255986	0.141449
SDF2L1	22q11.21	0.259415	0.025619	0.141449
PLAA	9p21.2	0.240625	0.0256344	0.141449
TTI1	20q11.23	0.381818	0.0258624	0.142565
PRPF3	1q21.2	0.25553	0.0258896	0.142573
PRPF19	11q12.2	0.240172	0.0259219	0.142609
EIF3E	8q23.1	0.24004	0.0260063	0.142932
EFCAB14	1p33	0.636364	0.0260969	0.143287
DLG1	3q29	0.245611	0.0261385	0.143374
MTHFD1	14q23.3	0.239719	0.0262123	0.143396
SYPL1	7q22.3	0.246996	0.0262171	0.143396
DSP	6p24.3	0.2397	0.0262244	0.143396
CES2	16q22.1	0.273562	0.0262462	0.143396
SGPL1	10q22.1	0.29427	0.0262887	0.143429
CASP6	4q25	0.251559	0.026304	0.143429
ISOC2	19q13.42	0.242179	0.0264528	0.143914
ERLIN2	8p11.23	0.239323	0.0264686	0.143914
FUCA2	6q24.2	0.254573	0.0264708	0.143914
GALE	1p36.11	0.240668	0.0265058	0.143963
ATP6V1D	14q23.3	0.266825	0.0266729	0.144728
MYO6	6q14.1	0.240336	0.0267214	0.14485
TRAFD1	12q24.13	0.60989	0.0268778	0.145304
ATP5F1C	10p14	0.238681	0.026888	0.145304
MYH9	22q12.3	0.238606	0.0269377	0.145304
PCNA	20p12.3	0.238606	0.0269377	0.145304
RBM42	19q13.12	0.255477	0.0269542	0.145304
SRSF7	2p22.1	0.238568	0.0269626	0.145304
ATP2A2	12q24.11	0.238492	0.0270125	0.145432
MRPL23	11p15.5	0.253397	0.0272	0.146268
LARP1	5q33.2	0.242433	0.0272283	0.146268
MRPL22	5q33.2	-0.262072	0.0272576	0.146268
MRPS16	10q22.2	0.256631	0.027304	0.146268
AIMP1	4q24	0.23804	0.0273131	0.146268
QARS	3p21.31	0.237945	0.0273761	0.146268
LRRC47	1p36.32	0.237926	0.0273887	0.146268
NUP50	22q13.31	0.246624	0.0274299	0.146268
CLDN7	17p13.1	0.440769	0.0274307	0.146268
MCEE	2p13.3	0.300172	0.0274318	0.146268
SRP54	14q13.2	0.239105	0.0275333	0.146645
DDX17	22q13.1	0.237643	0.0275785	0.146645
AP1S1	7q22.1	0.24639	0.027582	0.146645
SRRM1	1p36.11	0.238968	0.0276248	0.146732
RPS6KA1	1p36.11	0.237247	0.0278461	0.147765
AAGAB	15q23	-0.366538	0.027894	0.147773
MPI	15q24.1	0.253969	0.0279009	0.147773
INPP4B	4q31.21	0.376929	0.0279911	0.148076
HDAC2	6q21	0.23981	0.0280114	0.148076
UEVLD	11p15.1	0.278991	0.0281012	0.148409
TMEM87A	15q15.1	0.400667	0.0282247	0.148919
ZBTB7A	19p13.3	-0.370868	0.0282866	0.149103
NOSTRIN	2q24.3	0.629371	0.0283197	0.149136
GAPDH	12p13.31	0.236436	0.0284008	0.149252
FABP6	5q33.3	0.564286	0.0284325	0.149252
PLP2	Xp11.23	0.242085	0.0284357	0.149252
ARMC6	19p13.11	0.466968	0.0284495	0.149252
PCBP1	2p13.3	0.236304	0.028492	0.149302
HSPBP1	19q13.42	0.261902	0.0285128	0.149302
VARS	6p21.33	0.236096	0.0286358	0.149799
CTNND1	11q12.1	0.236058	0.028662	0.149799
ACTN1	14q24.1|14q22-q24	0.235907	0.028767	0.150169
SSU72	1p36.33	0.252575	0.0288009	0.150169
EBP	Xp11.23	0.257766	0.0288141	0.150169
PRDX3	10q26.11	0.235738	0.0288856	0.150259
DCTN1	2p13.1	0.235738	0.0288856	0.150259
ABHD12	20p11.21	0.255769	0.0289589	0.150499
PSMC5	17q23.3	0.235549	0.0290178	0.150664
CCT3	1q22	0.235492	0.0290576	0.150729
LPA	6q25.3-q26	0.264496	0.0292849	0.151766
DAD1	14q11.2	0.234907	0.0294712	0.152438
TNPO2	19p13.13	0.240561	0.0294799	0.152438
MTDH	8q22.1	0.23487	0.029498	0.152438
EIF2S1	14q23.3	0.234756	0.0295787	0.152438
GMPPA	2q35	0.236095	0.0296065	0.152438
TOMM70	3q12.2	0.234662	0.0296461	0.152438
CA2	8q21.2	0.234662	0.0296461	0.152438
EPB41L5	2q14.2	0.285798	0.0296472	0.152438
INPP1	2q32.2	0.2403	0.0296621	0.152438
SPCS3	4q34.2	0.234587	0.0297001	0.152492
ACSL5	10q25.2	0.238592	0.0298416	0.153076
GTPBP1	22q13.1	0.242968	0.0298843	0.153154
MYO9B	19p13.11	0.250327	0.0303036	0.155159
NPC1	18q11.2	0.334414	0.0304189	0.155605
ME2	18q21.2	0.233454	0.0305201	0.155954
ECPAS	9q31.3	0.233417	0.0305477	0.155954
PHF8	Xp11.22	0.496491	0.0305962	0.155954
SCFD1	14q12	0.233322	0.030617	0.155954
SDR39U1	14q12	0.303077	0.0306278	0.155954
CAPRIN1	11p13	0.23461	0.0306773	0.155966
NSFL1C	20p13	0.233228	0.0306864	0.155966
PRKAA1	5p13.1	0.235942	0.0307226	0.156007
MOGS	2p13.1	0.233134	0.0307559	0.156029
RRM2B	8q22.3	0.394883	0.030804	0.156029
RANGAP1	22q13.2	0.233058	0.0308116	0.156029
GHDC	17q21.2	0.296726	0.0309636	0.156656
HEXB	5q13.3	0.232813	0.0309932	0.156663
AKR1C1	10p15.1	0.236913	0.0310488	0.156801
DRG1	22q12.2	0.232605	0.0311475	0.157156
GNB2	7q22.1	0.232454	0.0312602	0.157581
PLOD3	7q22.1	0.235011	0.0314076	0.158044
CASP8	2q33.1	0.263189	0.0314091	0.158044
DTX2	7q11.23	0.538235	0.0314932	0.158323
RPS3	11q13.4	0.232096	0.0315292	0.158358
IKBIP	12q23.1	0.242113	0.0315757	0.158358
PAFAH1B2	11q23.3	0.245228	0.0315858	0.158358
FGB	4q31.3	0.231926	0.0316573	0.1585
COPB2	3q23	0.231888	0.0316858	0.1585
CKAP4	12q23.3	0.231869	0.0317001	0.1585
PSMB8	6p21.32	0.231775	0.0317715	0.158714
RPS29	14q21.3	0.237318	0.0318105	0.158766
KRT20	17q21.2	0.232754	0.0320615	0.159806
FAM177A1	14q13.2	-0.316559	0.0320827	0.159806
DRG2	17p11.2	0.234079	0.0321055	0.159806
ARSA	22q13.33	0.479699	0.0323261	0.16076
DPP4	2q24.2	0.319499	0.0324049	0.161007
WARS	14q32.2	0.230869	0.0324642	0.161157
TIMM44	19p13.2	0.230794	0.0325225	0.161184
NUP188	9q34.11	0.23636	0.0325277	0.161184
BCL2L2	14q11.2	0.24215	0.0326807	0.161797
PFKL	21q22.3	0.230379	0.0328447	0.162464
VAMP7	Xq28 and Yq12	0.264948	0.0329324	0.162753
PCMT1	6q25.1	0.229983	0.0331547	0.163633
SIRT5	6p23	0.268769	0.0331773	0.163633
PDIA4	7q36.1	0.229926	0.0331992	0.163633
SNX17	2p23.3	0.333101	0.033327	0.164117
RBM27	5q32	0.396059	0.0334305	0.164475
RFC2	7q11.23	0.239557	0.0334735	0.164475
NDUFA6	22q13.2	0.23368	0.0334887	0.164475
TACSTD2	1p32.1	0.55	0.0336554	0.165147
MTIF2	2p16.1	-0.307099	0.03374	0.165416
C6	5p13.1	-0.247064	0.0338242	0.165682
GDI1	Xq28	0.229058	0.0338877	0.165846
SMARCA5	4q31.21	0.228756	0.03413	0.166691
RPL36A	Xq22.1	0.23427	0.0341398	0.166691
ASRGL1	11q12.3	0.487719	0.0341506	0.166691
RPL36AL	14q21.3	0.232736	0.0342313	0.166938
NOMO2	16p12.3	0.229861	0.0343224	0.167235
LRPPRC	2p21	0.228454	0.0343737	0.167338
RBM39	20q11.22	0.228379	0.0344349	0.167488
CHMP6	17q25.3	0.293862	0.0344738	0.167531
EIF4H	7q11.23	0.229627	0.0345114	0.167567
THOC3	5q35.2	0.400657	0.0346141	0.167918
UBAC2	13q32.3	0.386874	0.0346877	0.168128
CORO7	16p13.3	0.227756	0.034943	0.169217
CIB1	15q26.1	0.230353	0.0350286	0.169483
RAB25	1q22	-0.247038	0.035114	0.169646
EMC1	1p36.13	0.230232	0.0351276	0.169646
MTMR6	13q12.13	0.399562	0.0351578	0.169646
FAM160B1	10q25.3	0.347321	0.0351848	0.169646
PSMD13	11p15.5	0.227303	0.0353164	0.170133
EPRS	1q41	0.227209	0.0353946	0.170211
BAG2	6p12.1	0.274459	0.0354101	0.170211
ARFGAP3	22q13.2	0.263462	0.0354247	0.170211
ACOT7	1p36.31	0.227001	0.0355672	0.170405
ARL1	12q23.2	0.238382	0.0355758	0.170405
HSD17B10	Xp11.22	0.226945	0.0356144	0.170405
ATE1	10q26.13	0.405983	0.0356248	0.170405
RPA3	7p21.3	0.253416	0.0356406	0.170405
TRAPPC3	1p34.3	0.244665	0.0356497	0.170405
CTSD	11p15.5	0.226737	0.0357879	0.170918
FOCAD	9p21.3	-0.413333	0.0358312	0.170977
STAG1	3q22.3	0.2737	0.0359422	0.171257
RPRD1B	20q11.23	0.227868	0.0359573	0.171257
ND5	-	0.249363	0.0359825	0.171257
COMMD3	10p12.2	0.285992	0.0360436	0.1714
EXOSC10	1p36.22	0.242418	0.0361258	0.171543
PGRMC2	4q28.2	0.226322	0.036137	0.171543
GM2A	5q33.1	-0.526471	0.0361665	0.171543
SF3B5	6q24.2	0.243895	0.0362529	0.171715
HMGCL	1p36.11	0.226171	0.0362646	0.171715
RPS26	12q13.2	0.225963	0.0364408	0.172401
GNS	12q14.3	0.250424	0.0365355	0.172702
NEO1	15q24.1	0.376613	0.0367697	0.173603
DDX54	12q24.13	0.274847	0.0367975	0.173603
TCP1	6q25.3	0.225492	0.0368437	0.173603
GRK2	11q13.2	0.267901	0.0368514	0.173603
CDK9	9q34.11	0.226715	0.0369323	0.173836
ADPGK	15q24.1	0.344002	0.0370907	0.174433
CAP1	1p34.2	0.225114	0.0371688	0.174489
CELF2	10p14	0.295366	0.0373023	0.174489
MED1	17q12	0.254968	0.0373167	0.174489
TXNIP	1q21.1	0.9	0.0373861	0.174489
PTGIR	19q13.32	0.9	0.0373861	0.174489
ENPP1	6q23.2	0.9	0.0373861	0.174489
IGFBP5	2q35	0.9	0.0373861	0.174489
PKP1	1q32.1	-0.9	0.0373861	0.174489
LYSMD2	15q21.2	0.9	0.0373861	0.174489
HMGA1	6p21.31	0.224718	0.0375127	0.174744
HECTD1	14q12	0.311067	0.0375353	0.174744
MOB1A	2p13.1	0.224643	0.0375785	0.174744
FBXO22	15q24.2	0.278606	0.0375958	0.174744
SYMPK	19q13.32	0.228622	0.0376289	0.174744
AHCY	20q11.22	0.224567	0.0376444	0.174744
CDH13	16q23.3	0.289081	0.0376614	0.174744
USP11	Xp11.3	0.286244	0.0377189	0.174864
PDS5B	13q13.1	0.228202	0.0379908	0.175978
SEC23B	20p11.23	0.224077	0.038075	0.17622
SH3GLB1	1p22.3	0.224001	0.0381417	0.176381
NAAA	4q21.1	0.277649	0.0382843	0.176774
WDR37	10p15.3	0.466165	0.0382905	0.176774
NMT1	17q21.31	0.226445	0.0383312	0.176815
UBE2C	20q13.12	0.328518	0.0384824	0.177049
YWHAQ	2p25.1	0.223605	0.0384931	0.177049
CPSF3	2p25.1	0.27489	0.0385043	0.177049
PDLIM1	10q23.33	0.223586	0.0385099	0.177049
ERCC2	19q13.32	0.601399	0.0385885	0.177206
ISG20L2	1q23.1	0.407863	0.0386078	0.177206
UQCRH	1p33	0.265468	0.0386646	0.17732
KCMF1	2p11.2	0.255026	0.0387759	0.177683
ARPC3	12q24.11	0.22319	0.0388641	0.177723
ACTR1A	10q24.32	0.223171	0.038881	0.177723
KPNB1	17q21.32	0.223171	0.038881	0.177723
ATP5PB	1p13.2	0.223001	0.0390337	0.178274
UGGT1	2q14.3	0.222907	0.0391187	0.178515
MAPK3	16p11.2	0.222737	0.0392722	0.179068
PIK3C2B	1q32.1	-0.442123	0.0393749	0.179389
RHPN2	19q13.11	0.264463	0.0394348	0.179514
C8A	1p32.2	0.264357	0.0395166	0.17952
EPS8L1	19q13.42	0.335376	0.0395543	0.17952
LCMT1	16p12.1	0.535714	0.039567	0.17952
CASP4	11q22.3	0.535714	0.039567	0.17952
RASAL3	19p13.12	-0.384236	0.0395982	0.17952
SPCS1	3p21.1	0.3493	0.0397127	0.17978
MYLK	3q21.1	-0.222209	0.0397528	0.17978
HNRNPH3	10q21.3	0.222209	0.0397528	0.17978
AP2A2	11p15.5	0.222114	0.0398392	0.180024
RBM26	13q31.1	0.268323	0.0399008	0.180155
MAGI1	3p14.1	0.291525	0.0399655	0.180287
ILF2	1q21.3	0.221944	0.039995	0.180287
TSPAN8	12q21.1	0.227261	0.0400439	0.18036
MAP1S	19p13.11	0.223002	0.0402238	0.181023
UBE2L6	11q12.1	0.254677	0.0406266	0.182688
CTNNBL1	20q11.23	0.256548	0.0407253	0.182983
GTF2I	7q11.23	0.221095	0.0407817	0.183088
ARCN1	11q23.3	0.221039	0.0408346	0.183108
RAB27B	18q21.2	0.22102	0.0408523	0.183108
EIF2A	3q25.1	0.224928	0.0409153	0.183181
MBNL1	3q25.1-q25.2	0.224907	0.0409347	0.183181
NAP1L4	11p15.4	0.220831	0.0410291	0.183455
MYO5A	15q21.2	0.260205	0.041103	0.183526
MICU2	13q12.11	0.226086	0.0411127	0.183526
ARMC10	7q22.1	0.244755	0.0411444	0.183526
UBXN4	2q21.3	0.237971	0.0411828	0.18355
CPT1A	11q13.3	0.221907	0.0412393	0.183654
SF3A1	22q12.2	0.220567	0.0412777	0.183667
CDCP1	3p21.31	0.368548	0.0413393	0.183667
ATP6V0D1	16q22.1	0.221771	0.0413677	0.183667
ARPC5L	9q33.3	0.220454	0.0413846	0.183667
NT5C	17q25.1	0.251727	0.0414571	0.183667
SCRIB	8q24.3	0.221673	0.0414596	0.183667
MAP2K3	17p11.2	0.225694	0.0414742	0.183667
YWHAZ	8q22.3	0.220265	0.0415634	0.183915
TARS	5p13.3	0.219963	0.0418507	0.185038
TMUB1	7q36.1	0.280519	0.0418946	0.185085
MZB1	5q31.2	0.225019	0.042103	0.185857
SDHB	1p36.13	0.219661	0.0421396	0.185871
GOLPH3L	1q21.3	0.224889	0.0422256	0.186102
IMMT	2p11.2|2	0.219491	0.0423029	0.186294
PTGR1	9q31.3	0.228992	0.0423622	0.186353
PRKCD	3p21.1	0.223332	0.0424065	0.186353
BAG1	9p13.3	0.297294	0.0424172	0.186353
ATG3	3q13.2	0.220481	0.0425949	0.186794
STAG2	Xq25	0.225881	0.0425995	0.186794
SURF1	9q34.2	0.254258	0.0426187	0.186794
RAB12	18p11.22	0.219114	0.0426676	0.18686
CTTN	11q13.3	0.219039	0.0427408	0.187033
BAG5	14q32.33	0.233028	0.0427849	0.187078
SUPT16H	14q11.2	0.218831	0.0429428	0.187621
SFT2D3	2q14.3	-0.359971	0.0430015	0.187729
TIPRL	1q24.2	0.246135	0.0430428	0.187762
MAOB	Xp11.3	0.228189	0.0431114	0.187913
MMS19	10q24.1	0.222472	0.0432295	0.188279
GGA1	22q13.1	0.343417	0.0434048	0.188678
POLR3A	10q22.3	0.245715	0.0434111	0.188678
USP10	16q24.1	0.220938	0.0434232	0.188678
ALDH2	12q24.12	0.218208	0.0435535	0.188991
SPAG9	17q21.33	0.230664	0.0435634	0.188991
SEC16A	9q34.3	0.218076	0.043684	0.189077
ACP1	2p25.3	0.218076	0.043684	0.189077
RETSAT	2p11.2	0.219328	0.0437175	0.189077
LAMTOR5	1p13.3	0.324696	0.0437199	0.189077
ORC3	6q15	0.236672	0.0438041	0.189294
UTP15	5q13.2	0.252747	0.0439077	0.189594
PRPF8	17p13.3	0.217793	0.0439646	0.189692
HIST4H4	12p12.3	0.217605	0.0441525	0.190268
FAP	2q24.2	0.383142	0.044167	0.190268
CARD19	9q22.31	0.285762	0.0442514	0.190352
FMOD	1q32.1	0.267501	0.0442552	0.190352
RAB6A	11q13.4	0.217057	0.0447013	0.192122
RAB34	17q11.2	0.216963	0.0447965	0.192382
PPP1R14A	19q13.2	0.464912	0.0448961	0.19266
PPP6R3	11q13.2	0.237057	0.0449663	0.192812
SUPT6H	17q11.2	0.22906	0.0450863	0.193177
OCLN	5q13.2	0.368187	0.0452952	0.193922
DARS	2q21.3	0.216359	0.0454097	0.194262
ABHD10	3q13.2	0.217373	0.045676	0.194998
NUDT19	19q13.11	0.250687	0.0457171	0.194998
AKR1A1	1p34.1	0.216057	0.0457188	0.194998
PSMB1	6q27	0.216038	0.0457382	0.194998
PSMD14	2q24.2	0.21602	0.0457576	0.194998
PA2G4	12q13.2	0.215982	0.0457964	0.195013
PFDN2	1q23.3	0.217041	0.0460161	0.195798
RRBP1	20p12.1	0.215548	0.0462445	0.196418
COL11A1	1p21.1	0.309294	0.0462467	0.196418
GNL1	6p21.33	0.222087	0.0462972	0.196418
SLC16A1	1p13.2	0.292091	0.0463456	0.196418
PRRC2A	6p21.33	0.343927	0.0464114	0.196418
RAB43	3q21.3	0.215378	0.0464209	0.196418
IMPAD1	8q12.1	0.37931	0.0465122	0.196418
MLF2	12p13.31	0.714286	0.0465282	0.196418
NME6	3p21.31	0.714286	0.0465282	0.196418
ZMPSTE24	1p34.2	0.249771	0.0465407	0.196418
MAN2A1	5q21.3	0.216474	0.046601	0.196418
SF3B6	2p23.3	0.216435	0.0466416	0.196418
UBE2D3	4q24	0.215152	0.0466568	0.196418
UBQLN1	9q21.32|9q21.2-q21.3	0.216416	0.0466619	0.196418
FKBP11	12q13.12	0.218987	0.0466982	0.196418
DNAJA2	16q11.2	0.218924	0.0467629	0.196418
RGS10	10q26.11	0.348596	0.046792	0.196418
PPID	4q32.1	0.221545	0.0468464	0.196418
TECR	19p13.12	0.216201	0.0468856	0.196418
FAU	11q13.1	0.214887	0.0469334	0.196418
EIF1AX	Xp22.12	0.218757	0.046936	0.196418
ANXA13	8q24.13	0.216123	0.0469672	0.196418
RUVBL2	19q13.33	0.214831	0.0469928	0.196418
FLNB	3p14.3	0.214812	0.0470127	0.196418
LAMP2	Xq24	0.214661	0.0471715	0.196756
HK1	10q22.1	0.214642	0.0471914	0.196756
GUK1	1q42.13	0.378216	0.0472001	0.196756
CIAO2B	16q22.1	0.342704	0.0472457	0.196798
MSN	Xq12	0.214548	0.047291	0.196838
GRWD1	19q13.33	0.219708	0.0473335	0.196868
PTPN6	12p13.31	0.215732	0.0473768	0.1969
SLC30A7	1p21.2	0.307674	0.0474623	0.19699
GREM1	15q13.3	0.281729	0.0474695	0.19699
PGAM5	12q24.33	0.219469	0.0475814	0.197306
PTBP3	9q32	0.214227	0.0476307	0.197363
DYNLT1	6q25.3	0.218043	0.0476771	0.1974
FAM120A	9q22.31	0.214152	0.047711	0.1974
PRPF4B	6p25.2	0.222035	0.0477636	0.19747
RAE1	20q13.31	0.215282	0.0478515	0.197486
POMP	13q12.3	0.58042	0.047856	0.197486
P4HA2	5q31.1	0.290125	0.0479046	0.197486
POU2F1	1q24.2	0.370443	0.04791	0.197486
UFM1	13q13.3	0.213869	0.0480128	0.197745
RRS1	8q13.1	0.230626	0.0480554	0.197745
PPP3CB	10q22.2	0.215067	0.0480799	0.197745
CIAO2A	15q22.31	0.235412	0.0481229	0.197775
OARD1	6p21.1	0.303081	0.0481989	0.197941
ISG20	15q26.1	0.416008	0.048338	0.198295
CDK5RAP3	17q21.32	0.213548	0.0483569	0.198295
APMAP	20p11.21	0.213435	0.0484788	0.198648
ARL8B	3p26.1	0.214657	0.0485185	0.198664
ERAP2	5q15	0.280192	0.0487445	0.199442
SEC31A	4q21.22	0.213076	0.0488665	0.199794
PTP4A2	1p35.2	0.243336	0.048976	0.200094
SNX3	6q21	0.212869	0.0490921	0.20042
ARMT1	6q25.1	0.257276	0.0491663	0.200571
APBB1IP	10p12.1	-0.424054	0.0492016	0.200571
NOP58	2q33.1	0.212718	0.0492568	0.200649
TMEM14C	6p24.2	0.252671	0.0494606	0.201194
ARPC4	3p25.3	0.212529	0.0494632	0.201194
CDC42	1p36.12	0.212321	0.0496911	0.201775
FDPS	1q22	0.212302	0.0497118	0.201775
AGPAT2	9q34.3	0.304757	0.0497153	0.201775
ACAA1	3p22.2	0.212246	0.0497742	0.201866
SHFL	19p13.2	0.666667	0.0498672	0.202095
ARL8A	1q32.1	0.213309	0.0499827	0.202351
NOP56	20p13	0.212038	0.0500033	0.202351
EFR3A	8q24.22	0.348974	0.0502783	0.203184
RAB4A	1q42.13	0.211774	0.0502961	0.203184
MCM5	22q12.3	0.214276	0.0503193	0.203184
SEC22B	1p12	0.21168	0.050401	0.203365
ARHGEF18	19p13.2	-0.467492	0.0504375	0.203365
MAN2B1	19p13.13	0.32385	0.050542	0.203638
ALG8	11q14.1	-0.454386	0.0506517	0.203932
TIMM13	19p13.3	0.211359	0.050759	0.204196
MACROD1	11q13.1	0.223408	0.0508083	0.204196
SCAMP3	1q22	0.211265	0.0508647	0.204196
PAK2	3q29	0.211265	0.0508647	0.204196
KRT6A	12q13.13	0.21117	0.0509706	0.204456
CC2D1B	1p32.3	0.6	0.0510033	0.204456
CTBP2	10q26.13	0.212351	0.0510445	0.204473
C5ORF51	5p13.1	0.261859	0.0512305	0.204567
VASN	16p13.3	0.573427	0.0512656	0.204567
PDZD8	10q25.3-q26.11	-0.573427	0.0512656	0.204567
TINAGL1	1p35.2	0.212136	0.0512854	0.204567
ARPC2	2q35	0.210887	0.0512894	0.204567
RTN4	2p16.1	0.210887	0.0512894	0.204567
CLASRP	19q13.32	0.52967	0.0514166	0.204619
GSDMA	17q21.1	0.52967	0.0514166	0.204619
KRT6B	12q13.13	0.210774	0.0514174	0.204619
PWP2	21q22.3	0.218542	0.0514693	0.204619
POFUT1	20q11.21	0.219912	0.0514892	0.204619
PRKCSH	19p13.2	0.21068	0.0515242	0.204619
SMG8	17q22	0.465428	0.0516016	0.20478
FEN1	11q12.2	0.210472	0.0517599	0.204926
CORO1C	12q24.11	0.210453	0.0517813	0.204926
ACE	17q23.3	0.317868	0.0518003	0.204926
PDPK1	16p13.3	0.326641	0.051849	0.204926
CUL5	11q22.3	0.23169	0.0518778	0.204926
AP1M2	19p13.2	0.211608	0.0518806	0.204926
HECTD3	1p34.1	0.258815	0.0518972	0.204926
SCAF4	21q22.11	0.211511	0.0519915	0.205025
TPRN	9q34.3	0.335982	0.0520514	0.205025
RPL37A	2q35	0.21017	0.0521043	0.205025
HIBADH	7p15.2	0.210151	0.0521258	0.205025
TAPBP	6p21.32	0.210133	0.0521474	0.205025
YWHAG	7q11.23	0.210114	0.052169	0.205025
GMPR	6p22.3	0.75	0.0521814	0.205025
PLIN3	19p13.3	0.209812	0.0525157	0.205994
NFKB2	10q24.32	0.287697	0.0525304	0.205994
MAOA	Xp11.3	0.212291	0.0525395	0.205994
PSMA6	14q13.2	0.209717	0.0526244	0.20618
LTN1	21q21.3	0.247211	0.0527318	0.20634
FNDC3A	13q14.2	0.255652	0.0527542	0.20634
LDHA	11p15.1	0.209585	0.0527769	0.20634
S100A9	1q21.3	0.209472	0.0529079	0.206621
IRAK4	12q12	0.391538	0.0529234	0.206621
VIL1	2q35	0.213194	0.0529724	0.206667
ASMTL	Xp22.33 and Yp11.2	0.215763	0.0530468	0.206811
RAB27A	15q21.3	0.209019	0.0534345	0.208177
LYPLA2	1p36.11	0.215379	0.0534812	0.208212
SLC25A3	12q23.1	0.208925	0.0535448	0.208313
MRPS23	17q22	0.213918	0.0536349	0.208517
FCGRT	19q13.33	0.292882	0.0536841	0.208562
ASS1	9q34.11	0.208736	0.0537659	0.208588
CCT8	21q21.3	0.208717	0.0537881	0.208588
SNX5	20p11.23	0.208699	0.0538102	0.208588
SARS2	19q13.2	0.215063	0.0538412	0.208588
CTSA	20q13.12	0.209869	0.053883	0.208604
PDLIM2	8p21.3	0.4613	0.0539905	0.208874
LACTB2	8q13.3	0.220437	0.0540467	0.208946
RBM4	11q13.2	0.217527	0.054138	0.209122
LEFTY1	1q42.12	-0.292319	0.0541679	0.209122
SUPT4H1	17q22	0.288538	0.05458	0.210566
ACSL3	2q36.1	0.207982	0.0546577	0.210573
AP1G1	16q22.2	0.207982	0.0546577	0.210573
OPA1	3q29	0.207887	0.0547701	0.210736
CUL2	10p11.21	0.21425	0.0547761	0.210736
IL16	15q25.1	-0.288011	0.0550429	0.211615
DDX19A	16q22.1	0.20751	0.0552213	0.212154
ADD1	4p16.3	0.207415	0.0553346	0.212442
SRM	1p36.22	0.220588	0.0555144	0.212854
PSMG3	7p22.3	0.434586	0.0555188	0.212854
MPDU1	17p13.1	0.214909	0.0555714	0.212909
SAP18	13q12.11	0.23833	0.0558958	0.214003
DDB1	11q12.2	0.206774	0.0561099	0.214334
TRA2B	3q27.2	0.209234	0.0561173	0.214334
STT3B	3p23	0.206755	0.0561328	0.214334
XPOT	12q14.2	0.207973	0.056137	0.214334
TMA7	3p21.31	-0.232546	0.0563499	0.214999
CEP295	11q21	-0.457172	0.0564616	0.215277
NDUFA13	19p13.11	0.207524	0.0566826	0.215971
RAB3D	19p13.2	0.206246	0.056755	0.216098
PPP5C	19q13.32	0.20617	0.0568477	0.216302
INTS11	1p36.33	0.260682	0.0569291	0.216464
LTA4H	12q23.1	0.206	0.0570566	0.216799
AHSA1	14q24.3	0.216328	0.0571316	0.216936
NEDD8	14q12	0.292057	0.0573839	0.217744
RPS15	19p13.3	0.235069	0.0574408	0.217796
ENG	9q34.11	0.253111	0.0574761	0.217796
TKT	3p21.1	0.205604	0.0575466	0.217825
VAMP8	2p11.2	0.248627	0.0575895	0.217825
PHF5A	22q13.2	0.22174	0.0576018	0.217825
TAGLN2	1q23.2	0.205491	0.0576872	0.217936
CYGB	17q25.1	0.233019	0.0577402	0.217936
ECSIT	19p13.2	0.272959	0.057749	0.217936
EIF4B	12q13.13	0.217151	0.0578238	0.217955
PSMA4	15q25.1	0.205359	0.0578516	0.217955
NDC1	1p32.3	0.356158	0.057918	0.217955
TSR2	Xp11.22	0.690476	0.0579903	0.217955
DDB2	11p11.2	0.690476	0.0579903	0.217955
ATRN	20p13	-0.690476	0.0579903	0.217955
ANKRD44	2q33.1	0.392174	0.0580363	0.217981
GSTK1	7q34	0.204962	0.0583471	0.21894
VDAC1	5q31.1	0.204944	0.0583708	0.21894
EPB41L1	20q11.23	0.209891	0.0584103	0.21894
PIK3C3	18q12.3	0.332553	0.0586335	0.219628
SNX2	5q23.2	0.204547	0.0588699	0.220364
PICALM	11q14.2	0.204378	0.0590849	0.22102
HEATR5B	2p22.2	-0.293574	0.0591634	0.221164
COBLL1	2q24.3	0.418182	0.0592258	0.221248
PPM1F	22q11.22	0.249008	0.0594413	0.221788
TBK1	12q14.2	0.242729	0.0594505	0.221788
TEX10	9q31.1	0.206297	0.0597379	0.222711
CD276	15q24.1	0.238479	0.0598059	0.222814
NDUFB5	3q26.33	0.407115	0.0600437	0.223446
RNF2	1q25.3	0.321008	0.0600746	0.223446
ASAH1	8p22	0.203585	0.0600965	0.223446
ACSF3	16q24.3	0.205832	0.0603293	0.224161
IER3IP1	18q21.1	0.21489	0.0605451	0.224812
SNRPF	12q23.1	0.237615	0.0607653	0.225479
ASPN	9q22.31	0.233741	0.0609349	0.225957
TJP2	9q21.11	0.203987	0.0611292	0.226526
RPL10	Xq28	0.202736	0.0611961	0.226595
PITPNB	22q12.1	0.206373	0.0612296	0.226595
DCN	12q21.33	-0.20385	0.0613067	0.226699
NUP54	4q21.1	0.205042	0.061343	0.226699
TACC1	8p11.22	0.272036	0.0614158	0.226699
XPO5	6p21.1	0.204981	0.0614216	0.226699
SUB1	5p13.3	0.202491	0.0615168	0.226899
PCYT1A	3q29	0.216927	0.0615643	0.226924
EHD3	2p23.1	0.202113	0.0620128	0.228139
SLC2A1	1p34.2	0.212307	0.0620269	0.228139
DSC2	18q12.1	0.221043	0.0620497	0.228139
NUP88	17p13.2	0.212281	0.0620587	0.228139
ZKSCAN1	7q22.1	0.350739	0.0621165	0.228189
SLC1A4	2p14	0.290333	0.0621546	0.228189
RAB4B	19q13.2	0.201925	0.062262	0.228432
MIOS	7p21.3	0.290171	0.0623073	0.228446
SCP2	1p32.3	0.201472	0.0628635	0.230305
PPP2R5E	14q23.2	0.212998	0.0629026	0.230305
ANXA6	5q33.1	0.201415	0.062939	0.230305
ITSN2	2p23.3	0.362637	0.063026	0.230471
IL18	11q23.1	0.279315	0.0631479	0.230765
CDK4	12q14.1	0.202345	0.0632871	0.231121
LIMS2	2q14.3	-0.205951	0.0634122	0.231425
CWC27	5q12.3	0.267041	0.0636145	0.231861
PDS5A	4p14	0.200906	0.0636219	0.231861
PIGO	9p13.3	0.288712	0.0636947	0.231861
GLA	Xq22.1	0.411688	0.0636989	0.231861
RPL23A	17q11.2	0.200792	0.0637745	0.231983
MRPL55	1q42.13	0.527473	0.0639549	0.232487
PRPH	12q13.12	0.200547	0.0641061	0.232884
LAP3	4p15.32	-0.201681	0.0641779	0.232992
HYOU1	11q23.3	0.200434	0.0642596	0.233136
MBOAT7	19q13.42	0.205276	0.0643028	0.23314
PFN1	17p13.2	0.200038	0.0647993	0.234786
PSME3	17q21.31	0.2	0.0648509	0.23482
CAMSAP3	19p13.2	0.347291	0.0649095	0.234878
DFFA	1p36.22	0.202308	0.0649594	0.234905
NOL7	6p23	0.22166	0.0651591	0.235474
ARFIP1	4q31.3	0.19966	0.0653167	0.235889
AIFM1	Xq26.1	0.199528	0.0654985	0.236392
NRM	6p21.33	-0.572727	0.0655431	0.236399
DKC1	Xq28	0.199358	0.065733	0.23693
TRIP10	19p13.3	0.234872	0.0661296	0.238204
CAT	11p13	0.198981	0.0662564	0.238506
POLR2A	17p13.1	0.207595	0.066389	0.238828
LMNA	1q22	0.198717	0.0666247	0.23952
TRAPPC12	2p25.3	0.6	0.066688	0.239592
UQCRB	8q22.1	0.198509	0.0669153	0.240253
NOC3L	10q23.33	0.246548	0.066985	0.240348
SMC6	2p24.2	0.521978	0.0672917	0.241292
AUH	9q22.31	0.396951	0.0673734	0.24138
EWSR1	22q12.2	0.199336	0.0674035	0.24138
CDC37	19p13.2	0.197981	0.0676597	0.242141
FGA	4q31.3	0.197849	0.0678468	0.242593
EFHD2	1p36.21	0.19783	0.0678736	0.242593
VPS26A	10q22.1	0.198945	0.0679537	0.242593
GOSR1	17q11.2	0.229625	0.0679612	0.242593
DNAJC3	13q32.1	0.203749	0.0680875	0.242888
CTSC	11q14.2	0.2	0.0681459	0.24294
BTN3A3	6p22.2	-0.395822	0.0682279	0.242995
HADHA	2p23.3	0.197566	0.0682492	0.242995
CCT7	2p13.2	0.197453	0.0684107	0.243414
GALNT5	2q24.1	0.311485	0.0685374	0.243708
SFXN3	10q24.31	0.197321	0.0685995	0.243772
SET	9q34.11	0.197283	0.0686535	0.243808
SMARCC2	12q13.2	0.197245	0.0687076	0.243844
CSK	15q24.1	0.212736	0.0687955	0.244
TFCP2	12q13.12-q13.13	0.199413	0.0689763	0.244388
NEBL	10p12.31	0.212588	0.0689933	0.244388
RPS27A	2p16.1	0.196924	0.0691684	0.244725
RPL28	19q13.42	0.198085	0.0691767	0.244725
MAT2B	5q34	0.196811	0.0693317	0.245116
ERGIC1	5q35.1	0.196604	0.0696318	0.245876
CDK12	17q12	0.196566	0.0696864	0.245876
OSBPL8	12q21.2	0.212025	0.069749	0.245876
ALDH1L1	3q21.3	0.266883	0.0697648	0.245876
CAB39	2q37.1	0.196509	0.0697685	0.245876
ATXN2	12q24.12	0.393563	0.0699616	0.2464
ANXA3	4q21.21	0.196245	0.0701526	0.246759
EPPK1	8q24.3	0.196245	0.0701526	0.246759
UROD	1p34.1	0.224089	0.0704812	0.247758
NTPCR	1q42.2	-0.198319	0.0705444	0.247822
ITPR3	6p21.31	0.198259	0.0706323	0.247961
SART1	11q13.1	0.197049	0.0706734	0.247961
SRRT	7q22.1	0.195773	0.0708426	0.248398
TRIM72	16p11.2	0.538462	0.0708943	0.248422
NFYC	1p34.2	-0.666667	0.0709877	0.248449
UGDH	4p14	0.195641	0.0710368	0.248449
PYCARD	16p11.2	0.195641	0.0710368	0.248449
NONO	Xq13.1	0.195566	0.071148	0.248681
PKP2	12p11.21	0.196521	0.0714458	0.249565
RAB13	1q21.3	0.195302	0.0715381	0.24973
MYO1B	2q32.3	0.195264	0.071594	0.249767
NUDT2	9p13.3	0.322581	0.0717544	0.250169
SMTN	22q12.2	-0.21972	0.0718078	0.250198
H2AFV	7p13	0.195019	0.0719581	0.250564
PTPRG	3p14.2	0.494505	0.0722497	0.251264
CCL20	2q36.3	0.494505	0.0722497	0.251264
C6ORF203	6q21	0.771429	0.0723965	0.251301
HPS3	3q24	0.771429	0.0723965	0.251301
FANCD2	3p25.3	-0.771429	0.0723965	0.251301
LMF2	22q13.33	0.256086	0.0726427	0.251886
DIAPH2	Xq21.33	0.204391	0.0726561	0.251886
CAPN1	11q13.1	0.19432	0.0730024	0.252929
UGT2B7	4q13.2	0.432405	0.0731082	0.252979
PBK	8p21.1	0.432405	0.0731082	0.252979
ILF3	19p13.2	0.194188	0.0732013	0.253143
EIF2B1	12q24.31	0.220169	0.0734079	0.253693
PACS1	11q13.1-q13.2	0.263529	0.0734858	0.253693
ACO1	9p21.1	0.193962	0.0735434	0.253693
KRT17	17q21.2	0.193962	0.0735434	0.253693
BYSL	6p21.1	0.218346	0.073648	0.253827
PIR	Xp22.2	0.325806	0.0736741	0.253827
STAU2	8q21.11	-0.272304	0.0737395	0.253895
MRPL50	9q31.1	0.236519	0.0738533	0.254129
DAP	5p15.2	0.265988	0.0739839	0.254322
TOR1AIP1	1q25.2	0.19366	0.0740014	0.254322
RBM34	1q42.3	0.29706	0.074184	0.254792
TIMM29	19p13.2	0.387916	0.0744415	0.255093
MTPN	7q33	0.19332	0.0745195	0.255093
STK26	Xq26.2	0.19332	0.0745195	0.255093
DYM	18q21.1	0.211493	0.0745212	0.255093
MTX2	2q31.1	0.195626	0.074529	0.255093
POLR2B	4q12	0.196801	0.0745479	0.255093
GNA13	17q24.1	0.193245	0.074635	0.255184
TOMM22	22q13.1	0.203	0.0746666	0.255184
EXOSC9	4q27	0.222334	0.0750619	0.256298
SP100	2q37.1	0.201412	0.0750853	0.256298
SAA2-SAA4	11p15.1	0.271036	0.0751466	0.25635
MSH3	5q14.1	-0.49011	0.0752201	0.256443
TRIO	5p15.2	0.347985	0.0752905	0.256454
BNIP1	5q35.1	0.531469	0.0753623	0.256454
YTHDC2	5q22.2	0.531469	0.0753623	0.256454
PTP4A1	6q12	0.233139	0.075563	0.256979
MOV10	1p13.2	0.213682	0.0757034	0.25727
ECI2	6p25.2	0.223581	0.0757414	0.25727
KBTBD11	8p23.3	0.232963	0.0757894	0.257275
KRT2	12q13.13	0.192339	0.0760324	0.257942
AAMDC	11q14.1	-0.266798	0.0764537	0.259213
AKR1C4	10p15.1	0.195458	0.0765903	0.259517
HDGFL2	19p13.3	0.226461	0.0767369	0.259855
B3GNT3	19p13.11	0.279443	0.0768258	0.259997
NUMA1	11q13.4	0.191622	0.0771535	0.260947
RBM6	3p21.31	0.384529	0.0772312	0.26105
EIF2B5	3q27.1	0.198617	0.0773679	0.261138
NDUFS3	11p11.2	0.191471	0.0773912	0.261138
TSPAN14	10q23.1	0.306952	0.0774325	0.261138
PALLD	4q32.3	-0.191434	0.0774507	0.261138
MFSD10	4p16.3	0.206516	0.0775036	0.261138
C17ORF49	17p13.1	0.191377	0.0775401	0.261138
SCRN2	17q21.32	0.393506	0.077588	0.261141
UBP1	3p22.3	0.265349	0.0781271	0.262773
WDR43	2p23.2	0.210429	0.078168	0.262773
COMMD6	13q22.2	0.203254	0.0782402	0.262857
APRT	16q24.3	0.190867	0.0783479	0.263059
HIST1H1B	6p22.1	0.190811	0.0784381	0.263202
IARS2	1q41	0.190735	0.0785584	0.263446
BMS1	10q11.21	0.267935	0.0786752	0.263634
MRPS5	2q11.1	-0.225001	0.0787096	0.263634
PBDC1	Xq13.3	0.191694	0.0788318	0.263884
RAB31	18p11.22	0.195024	0.0791213	0.264693
USP14	18p11.32	0.190245	0.0793443	0.265279
S100A8	1q21.3	0.190188	0.0794354	0.265423
MGMT	10q26.3	0.21558	0.0797644	0.266091
CYBA	16q24.2	0.336617	0.0798548	0.266091
AVEN	15q14	0.336617	0.0798548	0.266091
SNU13	22q13.2	0.189905	0.0798921	0.266091
SNX18	5q11.2	0.209222	0.0799321	0.266091
SELENOS	15q26.3	0.304507	0.0799448	0.266091
RIC8A	11p15.5	0.194458	0.0800127	0.266091
B3GNT2	2p15	0.524476	0.0800194	0.266091
ACTB	7p22.1	0.189679	0.0802589	0.266727
MTREX	5q11.2	0.189641	0.0803202	0.266771
VRK2	2p16.1	0.33607	0.080377	0.2668
KPNA2	17q24.2	0.190561	0.0806516	0.267521
ATRX	Xq21.1	0.308489	0.080691	0.267521
B2M	15q21.1	0.18932	0.0808425	0.267833
CRLF3	17q11.2	0.371542	0.0808816	0.267833
PLPBP	8p11.23	0.18915	0.0811201	0.268462
UNC13B	9p13.3	0.290422	0.0812044	0.268581
WASF2	1p36.11	0.188924	0.0814915	0.269369
A1BG	19q13.43	0.19105	0.0817119	0.269937
TRANK1	3p22.2	0.5	0.0818642	0.270131
TEX264	3p21.2	0.200875	0.0818683	0.270131
HSD17B8	6p21.32	-0.196933	0.0819369	0.270134
AP2S1	19q13.32	0.25636	0.0819665	0.270134
PDLIM7	5q35.3	-0.188584	0.082051	0.270251
COG6	13q14.11	0.206283	0.0821246	0.270333
NRP1	10p11.22	0.302368	0.0821944	0.270346
TACO1	17q23.3	0.21891	0.0822261	0.270346
GTF2B	1p22.2	0.243234	0.0822905	0.270366
NOC4L	12q24.33	0.27121	0.0823298	0.270366
RPL11	1p36.11	0.188264	0.0825823	0.271016
NT5DC2	3p21.1	0.545455	0.082651	0.271016
GIT2	12q24.11	0.250408	0.0826746	0.271016
RELCH	18q21.33	0.231722	0.0828483	0.271425
EXOC5	14q22.3	0.197537	0.0829969	0.271751
NHEJ1	2q35	0.252714	0.083104	0.271849
POLD2	7p13	0.192521	0.0831248	0.271849
SNRPA	19q13.2	0.190139	0.0832059	0.271953
SYNE1	6q25.2	0.233151	0.0837532	0.273581
SEC24A	5q31.1	0.187433	0.08397	0.274127
ADH4	4q23	0.310117	0.0841013	0.274394
AZGP1	7q22.1	0.266385	0.0842248	0.27459
ITGB4	17q25.1	0.188372	0.0842605	0.27459
SPARC	5q33.1	0.266234	0.0844075	0.274907
MANF	3p21.2	0.187113	0.0845111	0.275003
VPS28	8q24.3	0.196576	0.084536	0.275003
CDH3	16q22.1	0.444118	0.0848227	0.275638
HLA-DRA	6p21.32	0.186924	0.0848307	0.275638
PPIL4	6q25.1	0.344274	0.0850297	0.276122
ZNF622	5p15.1	0.295238	0.0850992	0.276186
IPO9	1q32.1	0.186679	0.0852476	0.276506
CNOT2	12q15	0.250977	0.0853153	0.276563
IPO4	14q12	0.188802	0.0854363	0.276794
MEMO1	2p22.3	0.278947	0.0854926	0.276814
GNAI2	3p21.31	0.186433	0.0856661	0.277003
COX6B1	19q13.12	0.187473	0.0857795	0.277003
STK39	2q24.3	0.187473	0.0857795	0.277003
DSG3	18q12.1	0.428922	0.085801	0.277003
PLEK2	14q23.3-q24.1	0.428922	0.085801	0.277003
CAPN5	11q13.5	0.199659	0.0859078	0.277003
CMBL	5p15.2	0.199659	0.0859078	0.277003
GNPDA1	5q31.3	0.225424	0.0860455	0.277003
PTPRA	20p13	0.245234	0.0860655	0.277003
CAPNS1	19q13.12	0.186188	0.0860863	0.277003
ERGIC2	12p11.22	0.313306	0.0861174	0.277003
ATP6	-	0.18615	0.0861511	0.277003
ENDOD1	11q21	0.192733	0.0867445	0.27875
ACAA2	18q21.1	0.185735	0.0868663	0.278979
PLEC	8q24.3	0.18566	0.0869968	0.279237
ATP1A1	1p13.1	0.185622	0.0870621	0.279284
MCM3	6p12.2	0.187729	0.0872615	0.279762
TKFC	11q12.2	0.185377	0.0874877	0.280325
GSDMB	17q21.1	0.241629	0.0875972	0.280434
ABCB6	2q35	-0.6	0.0876228	0.280434
RPS25	11q23.3	0.185226	0.0877504	0.28068
PRDX6	1q25.1	0.185188	0.0878162	0.280728
UBR2	6p21.1	-0.472527	0.0879674	0.281049
RCC2	1p36.13	0.185018	0.0881127	0.281351
COTL1	16q24.1	0.186086	0.0881664	0.281361
AP3M1	10q22.2	0.185871	0.0885409	0.282393
VASP	19q13.32	0.184735	0.0886086	0.282446
PYCR1	17q25.3	0.185753	0.0887457	0.28272
FMR1	Xq27.3	0.217899	0.0888803	0.282894
APEX1	14q11.2	0.184565	0.0889072	0.282894
YRDC	1p34.3	0.536364	0.0889534	0.282894
TMEM263	12q23.3	0.240543	0.0890747	0.283117
COX5A	15q24.2	0.184433	0.0891399	0.283162
ATP1A2	1q23.2	0.184358	0.0892732	0.283337
FYTTD1	3q29	0.196254	0.0892972	0.283337
BRAT1	7p22.3	0.214011	0.0894927	0.283795
GGH	8q12.3	0.184169	0.089607	0.283915
WDR77	1p13.2	0.213919	0.0896332	0.283915
IQGAP1	15q26.1	0.184112	0.0897073	0.283988
ALDH16A1	19q13.33	0.184037	0.0898412	0.284088
TCEA3	1p36.12	0.42402	0.0898417	0.284088
BST1	4p15.32	0.314794	0.0902048	0.285074
DHRS7	14q23.1	0.183792	0.0902775	0.285124
IVNS1ABP	1q25.3	-0.274899	0.0903237	0.285124
HSPA12A	10q25.3	0.353043	0.0906054	0.285769
PPAT	4q12	0.264403	0.0906311	0.285769
HUWE1	Xp11.22	0.18349	0.0908167	0.286192
EMC2	8q23.1	0.187884	0.0909639	0.286492
NUDCD2	5q34	0.192655	0.0910496	0.286599
PLD3	19q13.2	0.192504	0.0913095	0.287254
MINPP1	10q23.2	0.234156	0.0914915	0.287632
L2HGDH	14q21.3	0.207798	0.0915336	0.287632
ARMC8	3q22.3	0.257364	0.0916883	0.287955
RAD21	8q24.11	0.186243	0.0918327	0.288245
UCK2	1q24.1	-0.421569	0.0919126	0.288333
VTA1	6q24.1-q24.2	0.187231	0.0921133	0.288799
KRT16	17q21.2	0.182641	0.0923471	0.289368
EPCAM	2p21	0.18249	0.0926212	0.290063
VSNL1	2p24.2	-0.253491	0.0929207	0.290836
WTAP	6q25.3	0.228499	0.0933563	0.292035
DDX23	12q13.12	0.185257	0.0935972	0.292606
POLDIP2	17q11.2	0.194993	0.0936483	0.292606
RBFOX1	16p13.3	0.678571	0.0937503	0.292606
C1QTNF5	11q23.3	0.678571	0.0937503	0.292606
XPO7	8p21.3	0.18181	0.093863	0.292629
RBMXL1	1p22.2	0.18181	0.093863	0.292629
POLG	15q26.1	0.483516	0.0941347	0.293146
COL10A1	6q22.1	0.483516	0.0941347	0.293146
NAT1	8p22	0.291367	0.0945441	0.294094
ARMC1	8q13.1	0.36533	0.0945453	0.294094
DECR2	16p13.3	-0.291062	0.0949063	0.295051
RTN2	19q13.32	0.503497	0.0951574	0.2955
APLP2	11q24.3	0.503497	0.0951574	0.2955
ARHGDIB	12p12.3	0.181037	0.0952931	0.295756
GLG1	16q23.1	0.180867	0.0956093	0.296526
TMEM11	17p11.2	0.21179	0.0956484	0.296526
AP1M1	19p13.11	0.185207	0.0957495	0.296674
UXT	Xp11.23	0.294786	0.0958407	0.29679
IYD	6q25.1	0.392982	0.0960269	0.297201
SIRT3	11p15.5	-0.372727	0.0961022	0.297268
TRIM56	7q22.1	-0.208042	0.0963138	0.297756
MYO1A	12q13.3	0.180414	0.0964566	0.297974
DYNC1H1	14q32.31	0.180395	0.096492	0.297974
NUDT9	4q22.1	0.214648	0.0966733	0.298368
BCL10	1p22.3	0.247857	0.0967512	0.298442
IGF2R	6q25.3	0.185772	0.0968235	0.298499
FAM114A2	5q33.2	0.259379	0.0971629	0.299378
CKMT2	5q14.1	0.180692	0.0979484	0.301631
GSPT1	16p13.13	0.180653	0.0980222	0.301691
DPF2	11q13.1	0.197887	0.0980799	0.301701
ATP6V0A2	12q24.31	0.331282	0.0982904	0.30218
CDK2AP1	12q24.31	0.231623	0.0984921	0.302486
TBC1D2B	15q24.3-q25.1	-0.345217	0.0984991	0.302486
WNK2	9q22.31	-0.30723	0.0986396	0.30275
MMRN2	10q23.2	0.360813	0.0990059	0.303706
SCARB1	12q24.31	0.583333	0.0991858	0.303921
SERINC5	5q14.1	0.583333	0.0991858	0.303921
YTHDF3	8q12.3	0.186344	0.100115	0.306599
AGFG2	7q22.1	0.399381	0.1006	0.307508
CCL24	7q11.23	0.277992	0.100667	0.307508
CD9	12p13.31	0.178207	0.100672	0.307508
CDC23	5q31.2	0.305451	0.100708	0.307508
PCID2	13q34	-0.219601	0.100731	0.307508
ASL	7q11.21	0.178169	0.100745	0.307508
LCK	1p35.2	0.179167	0.100862	0.307695
RFC5	12q24.23	0.211951	0.101039	0.307979
HDHD2	18q21.1	0.3	0.101066	0.307979
P4HA1	10q22.1	0.184599	0.101163	0.308106
HEXA	15q23	0.177829	0.101407	0.308487
PNO1	2p14	0.227463	0.101417	0.308487
COPS5	8q13.1	0.1932	0.101488	0.308487
RPL36	19p13.3	0.177754	0.101554	0.308487
HDAC1	1p35.2-p35.1	0.180975	0.101567	0.308487
ELANE	19p13.3	0.182051	0.101643	0.308533
PIGR	1q32.1	0.184318	0.101693	0.308533
FAH	15q25.1	-0.220779	0.102019	0.309351
PWP1	12q23.3	0.454945	0.102154	0.30959
CAPN2	1q41	0.178464	0.102229	0.309649
MTX1	1q22	0.177376	0.102294	0.309676
ALB	4q13.3	0.17732	0.102405	0.309826
ELOC	8q21.11	0.178327	0.102497	0.309826
MGLL	3q21.3	0.188735	0.102511	0.309826
KRT14	17q21.2	0.177074	0.102889	0.310798
SOD2	6q25.3	0.176886	0.103262	0.31164
AK1	9q34.11	0.176867	0.103299	0.31164
CBX5	12q13.13	0.18003	0.103394	0.31164
ARL6IP1	16p12.3	0.181136	0.103402	0.31164
FGR	1p35.3	0.176791	0.103449	0.31164
FARSA	19p13.13	0.176622	0.103786	0.312039
CUL4B	Xq24	0.176584	0.103861	0.312039
NOP9	14q12	0.184323	0.103917	0.312039
EMC4	15q14	0.200415	0.10392	0.312039
RALGAPB	20q11.23	0.195976	0.103963	0.312039
MCM6	2q21.3	0.181933	0.104046	0.312039
ABCC10	6p21.1	-0.8	0.104088	0.312039
TDRD9	14q32.33	0.8	0.104088	0.312039
FAR2	12p11.22	-0.8	0.104088	0.312039
EXOC2	6p25.3	0.180527	0.104587	0.313179
MUC13	3q21.2	0.178313	0.104629	0.313179
VAC14	16q22.1-q22.2	-0.201545	0.104638	0.313179
TOP1	20q12	0.175829	0.105371	0.315203
FAF2	5q35.2	0.175697	0.105637	0.315828
RDH14	2p24.2	0.218455	0.10577	0.315942
GNAI3	1p13.3	0.175621	0.105789	0.315942
INTS8	8q22.1	0.291056	0.106059	0.316484
PHLDB1	11q23.3	0.262753	0.106085	0.316484
IDH3G	Xq28	0.18393	0.106965	0.318939
PCK1	20q13.31	0.178162	0.107084	0.319115
SEL1L	14q31.1	0.180352	0.10714	0.319115
CNOT9	2q35	0.191427	0.107219	0.319179
CTPS1	1p34.2	-0.195579	0.107285	0.319204
VPS53	17p13.3	0.187255	0.107682	0.320214
PCDH1	5q31.3	-0.304926	0.107744	0.320225
LMO7	13q22.2	0.17565	0.107844	0.32035
TM9SF1	14q12	0.181083	0.107948	0.320489
TAF15	17q12	0.174508	0.108055	0.320633
DOK3	5q35.3	0.369925	0.10841	0.321342
SDCBP2	20p13	0.369925	0.10841	0.321342
GNAO1	16q13	0.17415	0.108792	0.322304
RYR2	1q43	0.212464	0.109333	0.323735
F12	5q35.3	0.350649	0.109606	0.324368
PNN	14q21.1	0.188788	0.10969	0.324445
GYS1	19q13.33	0.208558	0.10979	0.324565
NUBPL	14q12	0.215858	0.110088	0.325272
CTBP1	4p16.3	0.173263	0.110633	0.326692
CCDC25	8p21.1	0.326923	0.110686	0.326692
CTNNBIP1	1p36.22	0.714286	0.110787	0.326816
TBCA	5q14.1	0.204452	0.11094	0.327092
KYNU	2q22.2	0.307608	0.111298	0.32782
ATP6V1C1	8q22.3	0.172942	0.111305	0.32782
RRP1	21q22.3	0.189144	0.111553	0.328088
TMPRSS2	21q22.3	0.240448	0.111604	0.328088
PRSS23	11q14.2	0.566667	0.111633	0.328088
RNF31	14q12	0.566667	0.111633	0.328088
PDPR	16q22.1	-0.194526	0.111927	0.328588
KLF5	13q22.1	0.262064	0.111965	0.328588
THYN1	11q25	0.357143	0.111981	0.328588
DYNC1LI2	16q22.1	0.172565	0.1121	0.328762
SERPINA7	Xq22.3	0.1813	0.112164	0.328778
GDA	9q21.13	0.251394	0.112851	0.330617
MORF4L2	Xq22.2	0.411765	0.113034	0.330977
NFKB1	4q24	0.17398	0.113477	0.331866
PARP12	7q34	0.247873	0.113482	0.331866
FDFT1	8p23.1	0.18947	0.113527	0.331866
POF1B	Xq21.1	0.174993	0.113577	0.331866
TRNT1	3p26.2	0.174951	0.113665	0.331902
MYO5B	18q21.1	0.17493	0.113709	0.331902
COX7A2	6q14.1	0.171735	0.113863	0.332175
MPHOSPH10	2p13.3	0.238735	0.114256	0.333086
RUFY3	4q13.3	-0.425	0.114295	0.333086
NAMPT	7q22.3	0.171489	0.114388	0.33318
TUFM	16p11.2	0.171433	0.114509	0.333355
UBAP2L	1q21.3	0.172425	0.114568	0.333355
HLA-F	6p22.1	0.175564	0.11464	0.333367
NHLRC2	10q25.3	0.182447	0.114693	0.333367
ATP9A	20q13.2	0.233117	0.114807	0.33345
ZC3H15	2q32.1	0.176536	0.114902	0.33345
HCLS1	3q13.33	0.209265	0.114903	0.33345
NUBP1	16p13.13	0.203913	0.114962	0.33345
SULT1A3	16p11.2	0.179858	0.115096	0.333663
OXCT1	5p13.1	0.17752	0.115179	0.333729
PAFAH1B3	19q13.2	-0.216848	0.115252	0.333768
COG2	1q42.2	0.174132	0.115392	0.333982
LRBA	4q31.3	0.172015	0.115447	0.333982
PLXNB2	22q13.33	0.173008	0.115539	0.334073
SLC5A6	2p23.3	0.298522	0.115722	0.334428
2019-03-01	1q41	0.227551	0.115848	0.334462
ELOVL1	1p34.2	0.210526	0.115974	0.334462
GSK3A	19q13.2	0.249303	0.115977	0.334462
PSMB6	17p13.2	0.185549	0.116033	0.334462
CDH1	16q22.1	0.171741	0.116036	0.334462
HSPH1	13q12.3	0.170659	0.116179	0.33463
RHOG	11p15.4	0.171604	0.116331	0.33463
ERLEC1	2p16.2	0.29803	0.116353	0.33463
CAD	2p23.3	0.170565	0.116384	0.33463
TSPAN1	1p34.1	0.198214	0.116396	0.33463
COQ9	16q21	0.17797	0.116608	0.334995
ME1	6q14.2	0.193511	0.116644	0.334995
PSMC4	19q13.2	0.170357	0.116835	0.335199
NAE1	16q22.1	0.170357	0.116835	0.335199
ACOT11	1p32.3	0.19794	0.116913	0.335247
PRKAR2A	3p21.31	0.170187	0.117206	0.335469
MYBBP1A	17p13.2	0.170187	0.117206	0.335469
MRPS27	5q13.2	0.175429	0.117232	0.335469
SEPTIN10	2q13	-0.175429	0.117232	0.335469
CHMP4B	20q11.22	0.171155	0.117305	0.335502
IMPDH2	3p21.31	0.17096	0.11773	0.336545
FBXW11	5q35.1	0.437363	0.117845	0.3367
RPS11	19q13.33	0.169848	0.11795	0.336801
MAN2C1	15q24.2	0.254453	0.118002	0.336801
RPE	2q34	0.179426	0.118429	0.337845
PSMD12	17q24.2	0.169565	0.118573	0.338082
TTN	2q31.2	0.185542	0.118663	0.338166
CDH11	16q21	0.370175	0.118752	0.338244
CASP10	2q33.1	0.214789	0.118829	0.338291
MIA2	14q21.1	0.285887	0.118977	0.338385
NCKAP1L	12q13.13-q13.2	0.380805	0.118984	0.338385
PRCC	1q23.1	-0.642857	0.119392	0.339371
CHIT1	1q32.1	-0.595238	0.11953	0.339587
PON1	7q21.3	0.216417	0.119594	0.339597
RPS6	9p22.1	0.168942	0.119951	0.340436
GATB	4q31.3	0.259839	0.120399	0.341495
SRP19	5q22.2	0.18871	0.120448	0.341495
SHOC2	10q25.2	0.211833	0.120522	0.34153
PLD1	3q26.31	0.368421	0.120645	0.341706
PRPSAP2	17p11.2	0.194406	0.120714	0.341726
AMPD3	11p15.4	0.22449	0.120967	0.342197
CLTA	9p13.3	0.16847	0.121004	0.342197
SAMD1	19p13.12	-0.378741	0.121164	0.342474
FXR1	3q26.33	0.185379	0.121682	0.343762
MYO1F	19p13.2	0.169103	0.121831	0.344008
UNC119B	12q24.31	0.432967	0.12201	0.344231
PPOX	1q23.3	-0.389706	0.122034	0.344231
WDR5	9q34.2	0.168927	0.122225	0.344544
SMPD3	16q22.1	0.339356	0.122328	0.344544
PREX2	8q13.2	0.450549	0.122332	0.344544
HADHB	2p23.3	0.16781	0.12249	0.344605
HAX1	1q21.3	-0.258416	0.122516	0.344605
LLGL2	17q25.1	0.172967	0.122546	0.344605
PHAX	5q23.2	0.288098	0.12262	0.344605
SERPINB5	18q21.33	0.17398	0.122726	0.344605
RPL22	1p36.31	0.167678	0.122789	0.344605
STX7	6q23.2	0.167678	0.122789	0.344605
MACF1	1p34.3	0.16764	0.122874	0.34467
NDUFA5	7q31.32	0.167546	0.123088	0.345095
ACYP1	14q24.3	0.244599	0.123248	0.345369
FSCN1	7p22.1	0.167395	0.123431	0.345707
SAFB	19p13.3	0.167225	0.123818	0.346614
HLA-DRB3	6p21.3	0.176744	0.124124	0.347294
CIAO1	2q11.2	0.209812	0.124186	0.347294
SMARCA4	19p13.2	0.172132	0.124391	0.347692
CRIP2	14q32.33	0.175407	0.12452	0.347725
CCNK	14q32.2	-0.2005	0.124528	0.347725
CSE1L	20q13.13	0.166847	0.12468	0.347973
ARFGAP2	11p11.2	0.170775	0.125033	0.34866
PDK1	2q31.1	0.203728	0.125052	0.34866
TNPO3	7q32.1	0.168492	0.125499	0.349609
CLYBL	13q32.3	-0.203482	0.125518	0.349609
USP47	11p15.3	0.183467	0.125642	0.349639
TRA2A	7p15.3	0.169451	0.125656	0.349639
SQOR	15q21.1	0.166357	0.125808	0.34986
SPCS2	11q13.4	0.167325	0.125861	0.34986
POLR1E	9p13.2	0.296114	0.126018	0.350119
PSMC2	7q22.1	0.166149	0.126287	0.350693
TMPO	12q23.1	0.166093	0.126419	0.350881
LCN2	9q34.11	0.169074	0.126514	0.350969
NDUFS5	1p34.3	0.167946	0.126748	0.351324
[truncated: 3,542 more rows]

## Sheet: co-expressed protein with KRT80
Correlated Gene	Cytoband	Spearman's Correlation	p-Value	q-Value
MANSC1	12p13.2	1	0	0
POLA2	11q13.1	1	0	0
DKK4	8p11.21	1	0	0
SNCG	10q23.2	1	0	0
PCLAF	15q22.31	1	0	0
ADA2	22q11.1	1	0	0
AMDHD2	16p13.3	0.79021	0.00222314	0.0418311
WDR91	7q33	0.729412	0.00134308	0.0315282
ZC3H7B	22q13.2	0.698529	0.00181343	0.0364
TRMT5	14q23.1	0.688338	0.0015871	0.0341135
GALC	14q31.3	0.656691	0.000900998	0.0282007
EIF4EBP2	10q22.1	0.651948	0.00136298	0.0317343
COMMD8	4p12	0.648221	0.000822708	0.0272922
BLOC1S4	4p16.1	0.643725	9.82893e-06	0.00320307
TP53RK	20q13.12	0.632174	0.00091914	0.0284471
CERS2	1q21.3	0.630865	0.000108451	0.0103589
GGT1	22q11.23	0.619829	0.000732289	0.0260156
EXOSC5	19q13.2	0.617418	0.000100309	0.00974937
IPO11	5q12.1	0.612308	0.00114071	0.031232
LRATD2	8q24.21	0.589379	0.000123946	0.0103701
GLTP	12q24.11	0.573846	0.0027056	0.045838
OAS1	12q24.13	0.551177	0.00236644	0.0424275
NMNAT1	1p36.22	0.54803	0.000251643	0.01549
IPO8	12p11.21	0.544257	1.92987e-06	0.00118794
VPS26B	11q25	0.543328	3.15267e-05	0.00567556
ADI1	2p25.3	0.541935	0.00163831	0.0346421
RPS13	11p15.1	0.53194	1.35979e-07	9.41654e-05
RCE1	11q13.2	0.521569	0.00131298	0.0314734
SPON1	11p15.2	0.518695	0.00235394	0.0423403
PARS2	1p32.3	0.498329	0.0031628	0.0494969
STX8	17p13.1	0.495262	0.000189343	0.0125906
ALG1	16p13.3	0.492683	0.00123932	0.0314555
CENPV	17p11.2	0.487084	9.14599e-05	0.00934344
LSM12	17q21.31	0.487063	3.88136e-05	0.00614364
RTKN	2p13.1	0.486425	0.000295605	0.0165248
EIF4E	4q23	0.477843	3.27774e-06	0.00181587
RPL38	17q25.1	0.474617	3.89726e-06	0.0019401
MALT1	18q21.32	0.474089	0.00229673	0.0419326
HBD	-	0.473202	4.20238e-06	0.0019401
TRADD	16q22.1	0.468085	0.000793677	0.0268108
TPP1	11p15.4	0.465975	6.14345e-06	0.00259369
HBA1	16p13.3	0.463578	6.95465e-06	0.00259369
PSMB3	17q12	0.46339	7.02262e-06	0.00259369
PSMB10	16q22.1	0.461721	1.62542e-05	0.00409311
ANP32A	15q23	0.459107	8.74406e-06	0.00302763
TTLL12	22q13.2	0.454125	1.12421e-05	0.00342653
GNG5	1p22.3	0.453508	0.000116153	0.0103701
C1QBP	17p13.2	0.453238	1.17516e-05	0.00342653
RBM3	Xp11.23	0.452653	0.00109219	0.0308852
ALYREF	17q25.3	0.449541	1.58928e-05	0.00409311
SPTB	14q23.3	0.449012	1.44915e-05	0.00401416
BRIX1	5p13.2	0.447815	0.000183683	0.012563
CCDC47	17q23.3	0.445593	1.92443e-05	0.00463537
TMED2	12q24.31	0.442409	3.16074e-05	0.00567556
LMAN2	5q35.3	0.442049	2.03441e-05	0.0046961
MMGT1	Xq26.3	0.440652	4.81972e-05	0.00667531
NECTIN2	19q13.32	0.43819	0.00129971	0.0314555
RPL3	22q13.1	0.436672	2.63052e-05	0.00561873
PSPC1	13q12.11	0.436313	2.67557e-05	0.00561873
RAB18	10p12.1	0.435822	2.73837e-05	0.00561873
MGST3	1q24.1	0.433926	3.34173e-05	0.00567556
GANAB	11q12.3	0.432803	3.15617e-05	0.00567556
LPCAT3	12p13.31	0.4325	0.000447108	0.0200226
NIBAN2	9q34.11	0.431822	3.30429e-05	0.00567556
CCT4	2p15	0.431332	3.38075e-05	0.00567556
HBB	11p15.4	0.428935	3.77854e-05	0.00614364
RPL4	15q22.31	0.427426	4.05107e-05	0.00623415
CALR	19p13.13	0.425841	4.35686e-05	0.00640142
SURF4	9q34.2	0.425671	4.39087e-05	0.00640142
DDOST	1p36.12	0.424879	4.55287e-05	0.00646741
HNRNPF	10q11.21	0.422822	4.99963e-05	0.00675559
INTS3	1q21.3	0.42181	0.00204989	0.0395693
RPL9	4p14	0.421576	5.28963e-05	0.00690858
SLC3A2	11q12.3	0.421275	5.36225e-05	0.00690858
ATP5PD	17q25.1	0.420576	5.53376e-05	0.00696751
SLC44A4	6p21.33	0.420335	0.00172635	0.0356726
ANP32B	9q22.33	0.41935	5.84747e-05	0.00715653
HACD3	15q22.31	0.419015	6.57318e-05	0.00774797
COMT	22q11.21	0.418991	5.94225e-05	0.00715653
UBA5	3q22.1	0.415546	0.00106432	0.0308852
FUBP3	9q34.11-q34.12	0.415491	8.48722e-05	0.00887155
LONP1	19p13.3	0.414671	7.20265e-05	0.0081502
HBG1	11p15.4	0.414652	7.20866e-05	0.0081502
HLA-B	6p21.33	0.413538	7.5717e-05	0.00834195
ATP6V0A1	17q21.2	0.413472	0.00231354	0.0419326
PSMA2	7p14.1	0.413218	7.67941e-05	0.00834195
EEF2	19p13.3	0.412708	7.85342e-05	0.00836691
GUF1	4p12	0.410418	0.00227056	0.0419326
HLA-A	6p22.1	0.408821	9.30649e-05	0.00934344
SERPINH1	11q13.5	0.408482	9.44464e-05	0.00934344
HLA-E	6p22.1	0.40637	0.000270047	0.0162615
SCAMP2	15q24.1	0.406287	0.000298282	0.0165248
TOM1	22q12.3	0.404293	0.000113122	0.0103701
SFPQ	1p34.3	0.403651	0.000116268	0.0103701
DNPH1	6p21.1	0.403454	0.000485245	0.0206446
MCU	10q22.1	0.4034	0.000129127	0.0103701
CCDC22	Xp11.23	0.403338	0.000443022	0.0200226
HNRNPA1	12q13.13	0.403293	0.00011806	0.0103701
B4GALT1	9p21.1	0.403016	0.00044816	0.0200226
PRRC1	5q23.2	0.402594	0.000121625	0.0103701
PSME2	14q12	0.402387	0.000122704	0.0103701
NOSIP	19q13.33	0.402266	0.00108235	0.0308852
VPS37B	12q24.31	0.402116	0.000462837	0.0203929
RPL21	13q12.2	0.401557	0.000127108	0.0103701
EIF5A	17p13.1	0.401481	0.000127516	0.0103701
DDX39A	19p13.12	0.401142	0.000129365	0.0103701
ANPEP	15q26.1	0.401089	0.00180698	0.0364
PPP1CA	11q13.2	0.40084	0.00013103	0.0103701
SYNJ2BP	14q24.2	0.400688	0.000158803	0.0113106
RPSA	3p22.1	0.399557	0.000138327	0.0107934
EIF4A2	3q27.3	0.398689	0.000143475	0.0110396
PHB2	12p13.31	0.39799	0.000147743	0.0110958
EIF4A1	17p13.1	0.397915	0.000148212	0.0110958
RPS2	16p13.3	0.397538	0.000150574	0.0111224
ITPK1	14q32.12	0.397394	0.00220656	0.0418311
SSB	2q31.1	0.397198	0.000152731	0.0111333
EZR	6q25.3	0.396198	0.000159246	0.0113106
RPS8	1p34.1	0.395783	0.000162026	0.0113623
TUBG1	17q21.2	0.395721	0.00100622	0.0301321
EIF4A3	17q25.3	0.395104	0.00016667	0.0115419
SEH1L	18p11.21	0.394249	0.00138788	0.0321708
SERBP1	1p31.3	0.392217	0.000187816	0.0125906
IPO7	11p15.4	0.39182	0.000190904	0.0125906
NT5DC1	6q22.1	0.391722	0.000557737	0.0221783
PPP2CB	8p12	0.390854	0.000216959	0.0139257
SLC44A2	19p13.2	0.390654	0.00108165	0.0308852
NUP62	19q13.33	0.38903	0.000361913	0.0182272
HNRNPA0	5q31.2	0.388613	0.000217684	0.0139257
HLA-C	6p21.33	0.388499	0.000218689	0.0139257
NCDN	1p34.3	0.387886	0.00219713	0.0418311
NDUFA8	9q33.2	0.387795	0.000318619	0.0173054
CANX	5q35.3	0.387103	0.000231448	0.0145707
MISP	19p13.3	0.38621	0.000285078	0.0164808
SUPT5H	19q13.2	0.385678	0.000488167	0.0206446
PRDX4	Xp22.11	0.385084	0.000251113	0.01549
SNRNP40	1p35.2	0.383958	0.000477251	0.020591
HNRNPD	4q21.22	0.383518	0.000267414	0.0162615
P4HB	17q25.3	0.382763	0.000275613	0.0164182
CMPK1	1p33	0.382065	0.000283403	0.0164808
TMED4	7p13	0.381744	0.000287049	0.0164808
STOML2	9p13.3	0.381612	0.000288563	0.0164808
SLC1A5	19q13.32	0.381168	0.000347336	0.0179475
CLTC	17q23.1	0.380801	0.000298025	0.0165248
ARPC1A	7q22.1	0.380743	0.00035312	0.0179475
RNPS1	16p13.3	0.380648	0.000538995	0.0217958
PNP	14q11.2	0.380216	0.000305023	0.0167309
ANXA2	15q22.2	0.378612	0.000324992	0.0174802
DDX3X	Xp11.4	0.378084	0.000331829	0.0176763
DDX39B	6p21.33	0.37782	0.000335296	0.0176909
RPL6	12q24.13	0.377518	0.0003393	0.0177332
ACOX1	17q25.1	0.377239	0.000561834	0.0221783
GALK2	15q21.1-q21.2	0.377191	0.000518326	0.0212933
PDCD6	5p15.33	0.376725	0.00035002	0.0179475
POGLUT3	11q22.3	0.37573	0.0015915	0.0341135
HNRNPK	9q21.32	0.375159	0.000372125	0.0183787
PSME1	14q12	0.37514	0.000372399	0.0183787
GPI	19q13.11	0.374971	0.000374873	0.0183787
HNRNPA3	2q31.2	0.374518	0.000381544	0.0185417
CHORDC1	11q14.3	0.374204	0.001203	0.0314555
KRT8	12q13.13	0.374121	0.000387471	0.018666
TMED10	14q24.3	0.373631	0.000394926	0.0187548
PPP2R1B	11q23.1	0.373555	0.000396084	0.0187548
RACK1	5q35.3	0.372593	0.000411131	0.0193022
ACTN4	19q13.2	0.372046	0.000419919	0.0195492
MTPAP	10p11.23	0.371314	0.00112569	0.0311815
BLVRB	19q13.2	0.371121	0.000435159	0.0200226
CYCS	7p15.3	0.37097	0.000437695	0.0200226
PON2	7q21.3	0.369846	0.000494512	0.0207545
HMOX2	16p13.3	0.36974	0.00128443	0.0314555
PPP2R1A	19q13.41	0.369461	0.00046381	0.0203929
WASHC4	12q23.3	0.369184	0.000642041	0.0240332
U2SURP	3q23	0.368782	0.000476021	0.020591
PTGES2	9q34.11	0.368593	0.000479464	0.020591
COPE	19p13.11	0.3668	0.000513337	0.0212933
DERL1	8q24.13	0.366562	0.000559697	0.0221783
RTRAF	14q22.1	0.366517	0.000518881	0.0212933
OTUB1	11q13.1	0.366064	0.000527866	0.0215028
HINT1	5q23.3	0.365982	0.000617952	0.0233228
H2AFY2	10q22.1	0.364999	0.000593419	0.0228242
RPS20	8q12.1	0.364196	0.000566453	0.0221783
NUDT21	16q13	0.364102	0.000568468	0.0221783
JAGN1	3p25.3	0.363664	0.00124167	0.0314555
GNPAT	1q42.2	0.363631	0.00156558	0.0341135
RPS24	10q22.3	0.363423	0.000583175	0.0225929
GBE1	3p12.2	0.362991	0.00108976	0.0308852
VCP	9p13.3	0.362781	0.000597383	0.0228242
PRPF4	9q32	0.362418	0.000704572	0.0256008
ALG2	9q22.33	0.362348	0.00120207	0.0314555
FNTA	8p11.21	0.361914	0.000834843	0.02753
DAZAP1	19p13.3	0.361838	0.000618854	0.0233228
SUN2	22q13.1	0.361657	0.000671809	0.0248122
EIF1	17q21.2	0.360459	0.000815674	0.0272219
PTGES3	12q13.3|12	0.360196	0.000657899	0.0244615
TOR4A	9q34.3	0.359883	0.00238734	0.0426564
SDR16C5	8q12.1	0.359152	0.00244026	0.0433302
PES1	22q12.2	0.35879	0.00108252	0.0308852
S100A10	1q21.3	0.358592	0.000698206	0.0256008
PPP2R5D	6p21.1	0.358253	0.000707026	0.0256008
PPP4C	16p11.2	0.357908	0.00129445	0.0314555
PTBP1	19p13.3	0.357649	0.000722956	0.0260077
RAB2B	14q11.2	0.357436	0.000784305	0.0268108
PDIA3	15q15.3	0.35729	0.000732569	0.0260156
AK2	1p35.1	0.356838	0.000744879	0.0262843
TOR1AIP2	1q25.2	0.356597	0.00125651	0.0314555
PSMA5	1p13.3	0.356441	0.000755804	0.0263708
RPL31	2q11.2	0.356404	0.000756852	0.0263708
CSTB	21q22.3	0.355649	0.000778094	0.0268108
U2AF1	21q22.3	0.355309	0.000787829	0.0268108
DDX21	10q22.1	0.355253	0.000789462	0.0268108
UBE2I	16p13.3	0.354876	0.000860636	0.0276556
ANXA10	4q32.3	0.354834	0.000996671	0.0300449
RPL15	3p24.2	0.354517	0.000810977	0.0272219
MPST	22q12.3	0.353102	0.000853859	0.0276556
RPL5	1p22.1	0.353064	0.00085503	0.0276556
HSD17B4	5q23.1	0.353045	0.000855616	0.0276556
ANXA4	2p13.3	0.352781	0.000863861	0.0276556
SAR1A	10q22.1	0.35263	0.000868605	0.0276556
EIF3A	10q26.11	0.352347	0.000877564	0.0277558
SSR4	Xq28	0.352215	0.000881774	0.0277558
NUTF2	16q22.1	0.352069	0.00146305	0.0332714
WDR61	15q25.1	0.351524	0.00104248	0.0308852
RHOB	2p24.1	0.351158	0.000916117	0.0284471
TIMM23	10q11.22	0.351096	0.00174345	0.0356726
NEDD4	15q21.3	0.350344	0.00255305	0.0443382
TMX2	11q12.1	0.350138	0.00126112	0.0314555
RPS10	6p21.31	0.3498	0.00096206	0.0296101
CRKL	22q11.21	0.349195	0.00113153	0.0311874
RPS5	19q13.43	0.349177	0.00098381	0.0300449
DBT	1p21.2	0.348978	0.00122319	0.0314555
CYB5B	16q22.1	0.348974	0.00106301	0.0308852
TIMM50	19q13.2	0.348837	0.00099586	0.0300449
CD44	11p13	0.348781	0.000997882	0.0300449
CLIP2	7q11.23	0.348223	0.00292192	0.0474705
SNRPG	2p13.3	0.347781	0.00127484	0.0314555
PPP6C	9q33.3	0.347371	0.00170932	0.0356726
SART3	12q23.3	0.346535	0.00108114	0.0308852
TUBA1C	12q13.12	0.346497	0.00108259	0.0308852
EEF1A1	6q13	0.346026	0.00110089	0.0308852
RDX	11q22.3	0.345969	0.0011031	0.0308852
LARS	5q32	0.34595	0.00110384	0.0308852
TMEM33	4p13	0.345611	0.00111722	0.0311025
ATP5MF-PTCD1	7q22.1	0.345186	0.00130115	0.0314555
RPL7	8q21.11	0.344912	0.00114518	0.031232
UBA1	Xp11.3	0.344743	0.00115208	0.031232
PRDX2	19p13.13	0.344648	0.00115593	0.031232
LRRC59	17q21.33	0.344516	0.00116133	0.031232
HNRNPH1	5q35.3	0.344139	0.00117691	0.0314301
IDH3A	15q25.1	0.344063	0.00118005	0.0314301
NACA	12q13.3	0.343724	0.00119426	0.0314555
CALU	7q32.1	0.343424	0.00129181	0.0314555
VPS4B	18q21.33	0.343365	0.00120943	0.0314555
UBE2L3	22q11.21	0.343214	0.00121587	0.0314555
RARS	5q34	0.343214	0.00121587	0.0314555
CFL1	11q13.1	0.342818	0.00123293	0.0314555
LACTB	15q22.2	0.342447	0.00133642	0.0315282
RPS10-NUDT3	6p21.31	0.342441	0.00124937	0.0314555
ATP1B3	3q23	0.342158	0.00126183	0.0314555
EEF1G	11q12.3	0.34129	0.00130076	0.0314555
EIF2S3	Xp22.11	0.341176	0.00130592	0.0314555
RPL35	9q33.3	0.340912	0.00131802	0.0314734
RPL30	8q22.2	0.340497	0.00133725	0.0315282
VAPA	18p11.22	0.340441	0.00133989	0.0315282
PPIF	10q22.3	0.339926	0.00145805	0.0332714
SERPINB9	6p25.2	0.339574	0.0014758	0.0332714
CYB5R2	11p15.4	0.339488	0.00288526	0.0471625
CSNK2A1	20p13	0.33895	0.00141117	0.0325744
C15ORF48	15q21.1	0.338882	0.00172547	0.0356726
DYNLL1	12q24.31	0.338735	0.00173399	0.0356726
SRSF10	1p36.11	0.338546	0.00174499	0.0356726
PABPC1	8q22.3	0.338308	0.00144289	0.0331684
CCT2	12q15	0.33778	0.00146949	0.0332714
TARDBP	1p36.22	0.337535	0.00148199	0.0332714
SND1	7q32.1	0.337403	0.00148877	0.0332714
KRT19	17q21.2	0.337384	0.00148974	0.0332714
NUP155	5p13.2	0.337176	0.00150044	0.0332714
CCT5	5p15.2	0.337157	0.00150142	0.0332714
LAMTOR3	4q23	0.33711	0.00271732	0.0458961
NIPSNAP1	22q12.2	0.336603	0.00163362	0.0346421
HDHD5	22q11.1	0.336101	0.00155703	0.0341135
RPS18	6p21.32	0.335874	0.00156919	0.0341135
HSP90AA1	14q32.31	0.335723	0.00157734	0.0341135
TOMM40	19q13.32	0.335723	0.00157734	0.0341135
PSMD2	3q27.1	0.335648	0.00158143	0.0341135
PABPC4	1p34.3	0.335327	0.00159893	0.0341135
SNRPD1	18q11.2	0.335289	0.00160099	0.0341135
ATP5F1B	12q13.3	0.334403	0.00165033	0.0346765
MVP	16p11.2	0.334365	0.00165246	0.0346765
EIF3B	7p22.3	0.333308	0.0017131	0.0356726
CHP1	15q15.1	0.332125	0.00202539	0.0393124
PGK1	Xq21.1	0.331987	0.00179172	0.0363893
DDX5	17q23.3	0.331855	0.00179976	0.0363893
TUBA1A	12q13.12	0.331855	0.00179976	0.0363893
DDX47	12p13.1	0.331472	0.00220529	0.0418311
PSMC3	11p11.2	0.331365	0.0018299	0.036545
RPS7	2p25.3	0.33127	0.00183575	0.036545
RPL18	19q13.33	0.331195	0.00184044	0.036545
FIS1	7q22.1	0.331151	0.00196349	0.0383018
ATP6V1A	3q13.31	0.330836	0.00186287	0.0368583
SELENOF	1p22.3	0.330591	0.00187836	0.0370325
RPLP2	11p15.5	0.330478	0.00188555	0.0370424
FKBP4	12p13.33	0.329383	0.00195632	0.0382969
PTRH2	17q23.1	0.329334	0.0020861	0.0400248
ARFGAP1	20q13.33	0.32925	0.00222701	0.0418311
USO1	4q21.1	0.328289	0.00202948	0.0393124
NSDHL	Xq28	0.327652	0.00265684	0.0453699
NME2	17q21.33	0.32744	0.00208793	0.0400248
PFDN6	6p21.32	0.327439	0.00284628	0.0469298
PLOD1	1p36.22	0.32607	0.0023237	0.0419326
RPLP0	12q24.23	0.325496	0.00222747	0.0418311
TM9SF2	13q32.3	0.325213	0.00224847	0.0419326
SSR1	6p24.3	0.324893	0.00227249	0.0419326
NAPA	19q13.32-q13.33	0.324685	0.00228816	0.0419326
YARS	1p35.1	0.32461	0.00229388	0.0419326
KPNA4	3q25.33	0.324572	0.00229675	0.0419326
KRT1	12q13.13	0.324478	0.00230392	0.0419326
SPTAN1	9q34.11	0.324308	0.00231689	0.0419326
SF3B3	16q22.1	0.324251	0.00232123	0.0419326
ABHD16A	6p21.33	0.324126	0.00279627	0.0468205
RBBP4	1p35.1	0.323881	0.00249641	0.0437661
RPL10A	6p21.31	0.323308	0.00239461	0.0426564
PUS1	12q24.33	0.322376	0.00262174	0.0451069
RPS16	19q13.2	0.322308	0.00247466	0.0437661
COPB1	11p15.2	0.322157	0.00248695	0.0437661
SKP1	5q31.1	0.321901	0.00300135	0.0481956
TUBA4A	2q35	0.321402	0.00254923	0.0443382
RPL7A	9q34.2	0.321364	0.00255238	0.0443382
PSMA7	20q13.33	0.321062	0.00257771	0.0446266
EIF3D	22q12.3	0.320817	0.00259846	0.0448456
ANXA11	10q22.3	0.320345	0.00263877	0.0452594
VPS35	16q11.2	0.320081	0.00266159	0.0453699
RPS23	5q14.2	0.319647	0.00269947	0.045838
HSP90AB1	6p21.1	0.318496	0.00280228	0.0468205
CYC1	8q24.3	0.318458	0.00280571	0.0468205
HNRNPA2B1	7p15.2	0.318383	0.00281258	0.0468205
ERP44	9q31.1	0.318364	0.0028143	0.0468205
SNRNP200	2q11.2	0.318157	0.00283328	0.0469298
NARS	18q21.31	0.318062	0.00284195	0.0469298
PELP1	17p13.2	0.317873	0.00285935	0.0470054
S100A11	1q21.3	0.317553	0.00288916	0.0471625
HSPA14	10p13	0.317496	0.00289445	0.0471625
TRAP1	16p13.3	0.316704	0.0029694	0.0479959
HPX	11p15.4	0.31659	0.00298025	0.0479959
GOT1	10q24.2	0.31659	0.00298025	0.0479959
SPTBN1	2p16.2	0.316175	0.00302033	0.0483603
COPZ1	12q13.13	0.316005	0.00303687	0.048391
TUBB2A	6p25.2	0.31593	0.00304425	0.048391
ECHS1	10q26.3	0.315836	0.00305349	0.048391
PSMD5	9q33.2	0.315798	0.00305719	0.048391
EIF5B	2q11.2	0.315383	0.0030982	0.0489003
SHMT2	12q13.3	0.314949	0.0031416	0.0494444
PGD	1p36.22	0.314854	0.0031511	0.0494536
UGT1A10	2q37.1	-0.52379	0.00249327	0.0437661
PROX1	1q32.3	-0.811189	0.00136332	0.0317343
GP1BB	22q11.21	-1	0	0

## Sheet: ISpearman's CorrelationI ≥0.4
Correlated Gene	Cytoband	Spearman's Correlation	P-value	q-Value
MANSC1	12p13.2	1	0	0
POLA2	11q13.1	1	0	0
DKK4	8p11.21	1	0	0
SNCG	10q23.2	1	0	0
PCLAF	15q22.31	1	0	0
ADA2	22q11.1	1	0	0
AMDHD2	16p13.3	0.79021	0.00222314	0.0418311
WDR91	7q33	0.729412	0.00134308	0.0315282
ZC3H7B	22q13.2	0.698529	0.00181343	0.0364
TRMT5	14q23.1	0.688338	0.0015871	0.0341135
GALC	14q31.3	0.656691	0.000900998	0.0282007
EIF4EBP2	10q22.1	0.651948	0.00136298	0.0317343
COMMD8	4p12	0.648221	0.000822708	0.0272922
BLOC1S4	4p16.1	0.643725	9.82893e-06	0.00320307
TP53RK	20q13.12	0.632174	0.00091914	0.0284471
CERS2	1q21.3	0.630865	0.000108451	0.0103589
GGT1	22q11.23	0.619829	0.000732289	0.0260156
EXOSC5	19q13.2	0.617418	0.000100309	0.00974937
IPO11	5q12.1	0.612308	0.00114071	0.031232
LRATD2	8q24.21	0.589379	0.000123946	0.0103701
GLTP	12q24.11	0.573846	0.0027056	0.045838
OAS1	12q24.13	0.551177	0.00236644	0.0424275
NMNAT1	1p36.22	0.54803	0.000251643	0.01549
IPO8	12p11.21	0.544257	1.92987e-06	0.00118794
VPS26B	11q25	0.543328	3.15267e-05	0.00567556
ADI1	2p25.3	0.541935	0.00163831	0.0346421
RPS13	11p15.1	0.53194	1.35979e-07	9.41654e-05
RCE1	11q13.2	0.521569	0.00131298	0.0314734
SPON1	11p15.2	0.518695	0.00235394	0.0423403
PARS2	1p32.3	0.498329	0.0031628	0.0494969
STX8	17p13.1	0.495262	0.000189343	0.0125906
ALG1	16p13.3	0.492683	0.00123932	0.0314555
CENPV	17p11.2	0.487084	9.14599e-05	0.00934344
LSM12	17q21.31	0.487063	3.88136e-05	0.00614364
RTKN	2p13.1	0.486425	0.000295605	0.0165248
EIF4E	4q23	0.477843	3.27774e-06	0.00181587
RPL38	17q25.1	0.474617	3.89726e-06	0.0019401
MALT1	18q21.32	0.474089	0.00229673	0.0419326
HBD	-	0.473202	4.20238e-06	0.0019401
TRADD	16q22.1	0.468085	0.000793677	0.0268108
TPP1	11p15.4	0.465975	6.14345e-06	0.00259369
HBA1	16p13.3	0.463578	6.95465e-06	0.00259369
PSMB3	17q12	0.46339	7.02262e-06	0.00259369
PSMB10	16q22.1	0.461721	1.62542e-05	0.00409311
ANP32A	15q23	0.459107	8.74406e-06	0.00302763
TTLL12	22q13.2	0.454125	1.12421e-05	0.00342653
GNG5	1p22.3	0.453508	0.000116153	0.0103701
C1QBP	17p13.2	0.453238	1.17516e-05	0.00342653
RBM3	Xp11.23	0.452653	0.00109219	0.0308852
ALYREF	17q25.3	0.449541	1.58928e-05	0.00409311
SPTB	14q23.3	0.449012	1.44915e-05	0.00401416
BRIX1	5p13.2	0.447815	0.000183683	0.012563
CCDC47	17q23.3	0.445593	1.92443e-05	0.00463537
TMED2	12q24.31	0.442409	3.16074e-05	0.00567556
LMAN2	5q35.3	0.442049	2.03441e-05	0.0046961
MMGT1	Xq26.3	0.440652	4.81972e-05	0.00667531
NECTIN2	19q13.32	0.43819	0.00129971	0.0314555
RPL3	22q13.1	0.436672	2.63052e-05	0.00561873
PSPC1	13q12.11	0.436313	2.67557e-05	0.00561873
RAB18	10p12.1	0.435822	2.73837e-05	0.00561873
MGST3	1q24.1	0.433926	3.34173e-05	0.00567556
GANAB	11q12.3	0.432803	3.15617e-05	0.00567556
LPCAT3	12p13.31	0.4325	0.000447108	0.0200226
NIBAN2	9q34.11	0.431822	3.30429e-05	0.00567556
CCT4	2p15	0.431332	3.38075e-05	0.00567556
HBB	11p15.4	0.428935	3.77854e-05	0.00614364
RPL4	15q22.31	0.427426	4.05107e-05	0.00623415
CALR	19p13.13	0.425841	4.35686e-05	0.00640142
SURF4	9q34.2	0.425671	4.39087e-05	0.00640142
DDOST	1p36.12	0.424879	4.55287e-05	0.00646741
HNRNPF	10q11.21	0.422822	4.99963e-05	0.00675559
INTS3	1q21.3	0.42181	0.00204989	0.0395693
RPL9	4p14	0.421576	5.28963e-05	0.00690858
SLC3A2	11q12.3	0.421275	5.36225e-05	0.00690858
ATP5PD	17q25.1	0.420576	5.53376e-05	0.00696751
SLC44A4	6p21.33	0.420335	0.00172635	0.0356726
ANP32B	9q22.33	0.41935	5.84747e-05	0.00715653
HACD3	15q22.31	0.419015	6.57318e-05	0.00774797
COMT	22q11.21	0.418991	5.94225e-05	0.00715653
UBA5	3q22.1	0.415546	0.00106432	0.0308852
FUBP3	9q34.11-q34.12	0.415491	8.48722e-05	0.00887155
LONP1	19p13.3	0.414671	7.20265e-05	0.0081502
HBG1	11p15.4	0.414652	7.20866e-05	0.0081502
HLA-B	6p21.33	0.413538	7.5717e-05	0.00834195
ATP6V0A1	17q21.2	0.413472	0.00231354	0.0419326
PSMA2	7p14.1	0.413218	7.67941e-05	0.00834195
EEF2	19p13.3	0.412708	7.85342e-05	0.00836691
GUF1	4p12	0.410418	0.00227056	0.0419326
HLA-A	6p22.1	0.408821	9.30649e-05	0.00934344
SERPINH1	11q13.5	0.408482	9.44464e-05	0.00934344
HLA-E	6p22.1	0.40637	0.000270047	0.0162615
SCAMP2	15q24.1	0.406287	0.000298282	0.0165248
TOM1	22q12.3	0.404293	0.000113122	0.0103701
SFPQ	1p34.3	0.403651	0.000116268	0.0103701
DNPH1	6p21.1	0.403454	0.000485245	0.0206446
MCU	10q22.1	0.4034	0.000129127	0.0103701
CCDC22	Xp11.23	0.403338	0.000443022	0.0200226
HNRNPA1	12q13.13	0.403293	0.00011806	0.0103701
B4GALT1	9p21.1	0.403016	0.00044816	0.0200226
PRRC1	5q23.2	0.402594	0.000121625	0.0103701
PSME2	14q12	0.402387	0.000122704	0.0103701
NOSIP	19q13.33	0.402266	0.00108235	0.0308852
VPS37B	12q24.31	0.402116	0.000462837	0.0203929
RPL21	13q12.2	0.401557	0.000127108	0.0103701
EIF5A	17p13.1	0.401481	0.000127516	0.0103701
DDX39A	19p13.12	0.401142	0.000129365	0.0103701
ANPEP	15q26.1	0.401089	0.00180698	0.0364
PPP1CA	11q13.2	0.40084	0.00013103	0.0103701
SYNJ2BP	14q24.2	0.400688	0.000158803	0.0113106
UGT1A10	2q37.1	-0.52379	0.00249327	0.0437661
PROX1	1q32.3	-0.811189	0.00136332	0.0317343
GP1BB	22q11.21	-1	0	0
